# Supplementary material for: Background splicing and genetic disease
Source: Research Square preprint supplement (doi:10.21203/rs.3.rs-92665/v1), 2020-10-15
Supplement: Supplementary file 1 [file 256868d4e122ab37da878ca9.xlsx]

## Sheet: Summary Table (Gtex)
Spliceosome	Aberrant	Match to	Within top	Within 3	Read ratio
mutation	splicing type	snaptron gtex	3 reads	nearest ss	(canonical/aberrant)
SF3B1	3'css	10/10	10/10	8/10	4138
Darman et al 2015	5'css	10/10	7/10	2/10	6241
	Exon skips	10/10	6/10	na	62
	Exon inclusion	11/11	22/22	na	24
SF3B1	3'css proximal	9/9	9/9	9/9	424
DeBoever et al 2015	3'css distal	12/12	10/12	4/12	2868
U1 Suzuki et al 2019	5'css	10/10	5/10	5/10	141

## Sheet: SF3B1 3'css Darman et al 
Daman et al 2015. Data taken from Table 2S, filtered for 3'css, for the highest ratio of aberrant:Canonical reads and for junction novelty							Snaptron analysis						Daman et al 2015, detection of aberrant splcing in different cancers
Gene Symbols	Canonical junction	Aberrant Junction	Type of aberrant splicing	Distance of ass from canonical	Aberrant/canonical junction reads	Junction novelty	Read rank	Nearness rank to 3'ss	Closest intronic site to 3'ss?	Canonical reads	Aberrant reads	Canonical/aberrant reads	Significant in BRCA	Significant in CLL	Significant in UVM	Significant in SKCM
ERGIC3	chr20:34144042-34144743:+	chr20:34144042-34144725:+:start	3'ass	-18	354	True	1/35	1/35	Yes	3347743	18596	180.025	True	True	True	True
C2,CFB	chr6:31919381-31919651:+	chr6:31919381-31919565:+:start	3'ass	-96	321	True	1/10	4/10	3rd	2417846	213	11351.4	True	False	False	False
SLC3A2	chr11:62648919-62649364:+	chr11:62648919-62649352:+:start	3'ass	-12	238	True	1/15	2/15	Yes	1237070	5480	225.743	True	True	True	True
SNORA31,TPT1	chr13:45911523-45912794:-	chr13:45911538-45912794:-:end	3'ass	-15	177	True	2/50	2/50	Yes	22203544	15686	1415.5	False	False	True	True
RPL24	chr3:101401336-101401614:-	chr3:101401353-101401614:-:end	3'ass	-17	171	True	2/54	2/54	Yes	2727840	2776	982.651	True	False	False	True
OAS1	chr12:113346629-113348855:+	chr12:113346629-113348840:+:start	3'ass	-15	171	True	2/22	2/22	Yes	222325	1260	176.448	True	True	False	True
C2,CFB	chr6:31919381-31919651:+	chr6:31919381-31919551:+:start	3'ass	-100	158	True	2/10	6/10	4th	2417846	100	24178.5	True	False	False	False
RPL27A,SNORA45,SNORA3	chr11:8704812-8705552:+	chr11:8704812-8705536:+:start	3'ass	-16	144	True	2/55	2/55	2nd	2339577	14583	160.432	True	False	True	True
RP11-164J13.1,GANC,CAPN3	chr15:42700522-42701500:+	chr15:42700522-42701479:+:start	3'ass	-21	111	True	2/10	2/10	Yes	848531	413	2054.55	False	False	True	False
C11orf2,VPS51,TM7SF2	chr11:64877395-64877953:+	chr11:64877395-64877934:+:start	3'ass	-19	110	True	1/23	1/23	Yes	1889352	2863	659.92	True	True	True	True
												41385.1
												4138

## Sheet: SF3B1 5'css Darman et al 
Daman et al 2015. Data taken from Table 2S, filtered for 5'css, for the highest ratio of aberrant:Canonical reads and for junction novelty								Snaptron analysis					Daman et al 2015, detection of aberrant splcing in different cancers
Gene Symbols	Canonical junction	Aberrant Junction	Type of aberrant splicing	Distance of 5'css from 5'ss	Distance from 3'ss	Aberrant/canonical junction reads	Junction novelty	Read rank	Nearness to canonical 5'ss	Canonical reads	Aberrant reads	Canonical/aberrant reads	Significant in BRCA	Significant in CLL	Significant in UVM	Significant in SKCM
EXOC3	chr5:462422-464404:+	chr5:462644-464404:+:end	5'css	+222	-1760	143	True	1/18	2/18	732268	12067	60.6835	False	False	False	True
ARHGAP25	chr2:69015088-69034404:+	chr2:69015785-69034404:+:end	5'css	+697	-18619	73	True	6/36	2/33	103839	339	306.31	False	True	False	False
SSU72	chr1:1480382-1500152:-	chr1:1480382-1497319:-:start	5'css	+2814	-16937	56	True	15/75	12/75	2410868	55	43834	False	False	False	True
CAPZA1	chr1:113192091-113196219:+	chr1:113195986-113196219:+:end	5'css	+3895	-233	38	True	3/14	9/14	418549	379	1104.35	False	False	False	True
SSU72	chr1:1480382-1500152:-	chr1:1480382-1497338:-:start	5'css	+2833	-16956	35	True	10/75	15/75	2410868	154	15655	False	False	False	True
INE1,UBA1	chrX:47059013-47060292:+	chrX:47059943-47060292:+:end	5'css	+930	-349	30	True	1/20	11/20	982485	1668	589.02	True	False	False	True
AP000350.10,SLC2A11,MIF	chr22:24204389-24210667:+	chr22:24210086-24210667:+:end	5'css	+5697	-581	25	True	1/10	7/10	136426	321	425.003	False	True	False	False
EMP2	chr16:10641534-10674405:-	chr16:10641534-10652850:-:start	5'css	+21555	-11316	21	True	1/78	43/78	684946	33310	20.5628	False	False	True	False
FXYD5	chr19:35646514-35648323:+	chr19:35647877-35648323:+:end	5'css	+1363	-446	18.5	True	1/15	10/15	1652398	5652	292.356	False	False	False	True
IQCK	chr16:19838459-19867808:+	chr16:19843318-19867808:+:end	5'css	+4859	-24490	16	True	2/32	6/32	196452	1529	128.484	False	False	True	False
												62415.7
												6241.57

## Sheet: SF3B1 exon skip Darman et al
Darman et al 2015. Table S2 filtered for exon skipping, then junction novelty then highest ratio of aberrant/Canonical splicing.							Snaptron analysis					Daman et al 2015, detection of aberrant splcing in different cancers
Gene Symbols	Canonical junction	Aberrant Junction	Exon skipping	size of skip	Junction novelty	Aberrant/canonical junction reads	exon skip details	rank	skip reads	Canonical reads	Canonical/aberrant reads	Significant in BRCA	Significant in CLL	Significant in UVM	Significant in SKCM
INO80E	chr16:30012851-30016541:+	chr16:30012851-30016688:+:start	True	3837	True	14	Use of a downstream alternative 3'ss that also skips at leat one exon.	5/49	6646	214716	32.3076	True	False	True	False
GHDC	chr17:40341939-40342202:-	chr17:40341105-40342202:-:end	True	1097	True	11	Downstream 3'ass	1/21	3325	371758	111.807	False	False	True	False
DKFZp686O1327,,U80770,TEX41,BC040861	chr2:145780840-145929564:+	chr2:145780840-145873979:+:start	True	93139	True	4.66667	not a skip, intronic 3'css	12/65	43	14806	344.326	False	False	True	False
DHRS13,FLOT2	chr17:27210249-27211242:-	chr17:27210249-27212874:-:start	True	2625	True	2.91667	Use of an alternative upstream 5'ss	2/46	86973	807895	9.28903	False	False	False	True
EIF4A2	chr3:186502890-186503671:+	chr3:186502302-186503671:+:end	True	1369	True	2.83333	5' double exon skip	2/20	47873	3380366	70.6111	False	False	True	False
ZNF107	chr7:64139714-64144464:+	chr7:64139714-64150765:+:start	True	11051	True	2.6	3'ass	4/51	1219	6406	5.25513	False	True	False	False
,EVC	chr4:5815889-5819937:+	chr4:5815889-5825343:+:start	True	9454	True	2.22222	3'ass	1/65	36051	211804	5.87512	True	False	False	False
ANKHD1-EIF4EBP3,ANKHD1	chr5:139909381-139914946:+	chr5:139909381-139916922:+:start	True	7541	True	1.55556	3'ass	1/30	99583	746243	7.49368	False	False	False	True
ZBED1,DHRSX	chrX:2310515-2326785:-	chrX:2209644-2326785:-:end	True	117141	True	0.984848	3'single skip (skip reads > canonical)	1/60	210962	53564	0.253904	True	False	False	False
DKFZp686O1327,,U80770,TEX41,BC040861	chr2:145780840-145929564:+	chr2:145780840-145875122:+:start	True	94282	True	0.818182	not a skip, 3'css	4/65	476	14806	31.105	False	False	True	False
											618.323
											61.8

## Sheet: SF3B1 pseudoex Darman et al 
Darman et al 2015 Table S2. Data filtered for exon inclusion, suitable pairs and novel junctions							Snaptron analysis				Darman et al 2015. Detection of exon inclusion in other cancers
Gene Symbols	Canonical junction	Aberrant Junctions	Exon inclusion	Junction novelty	Aberrant/canonical junction reads	exon size	Read rank	Canoncial reads	included exon reads	canonical/included reads	Significant in BRCA	Significant in CLL	Significant in UVM	Significant in SKCM
BAG6,BAT3	chr6:31611971-31612301:-	chr6:31612191-31612301:-:end	True	True	1.45887	108	1/35	1025440	553320	1.85325	True	True	False	False
BAT3,BAG6	chr6:31611971-31612301:-	chr6:31611971-31612083:-:start	True	True	1.38071		1/10	1025440	484464	2.11665	True	True	False	False
BRD9	chr5:865696-870587:-	chr5:869519-870587:-:end	True	True	14	160	2/33	412817	15748	26.2139	True	True	True	True
BRD9	chr5:865696-870587:-	chr5:865696-869359:-:start	True	True	13		1/31	412817	27680	14.9139	False	True	True	False
CBR4	chr4:169911479-169923221:-	chr4:169919436-169923221:-:end	True	True	1.88889	84	1/66	112479	56340	1.99643	False	False	False	True
CBR4	chr4:169911479-169923221:-	chr4:169911479-169919352:-:start	True	True	1.46667		1/20	112479	70644	1.59219	False	False	False	True
CSNK1E	chr22:38690540-38694790:-	chr22:38691453-38694790:-:end	True	True	3.46154	62	2/57	1156452	66648	17.3516	False	False	True	False
CSNK1E	chr22:38690540-38694790:-	chr22:38690540-38691392:-:start	True	True	3.44444		1/26	1156452	105989	10.9111	False	False	True	False
ICA1	chr7:8261028-8268230:-	chr7:8261028-8267267:-:start	True	True	7.33333	214	1/19	210370	13532	15.5461	True	False	False	False
ICA1	chr7:8261028-8268230:-	chr7:8267481-8268230:-:end	True	True	6		1/25	210370	13142	16.0075	True	False	False	False
MTA1	chr14:105933079-105935803:+	chr14:105934686-105935803:+:end	True	True	3.33333	12	1/26	116653	2954	39.4898	False	False	True	False
MTA1	chr14:105933079-105935803:+	chr14:105933079-105934674:+:start	True	True	3		3/43	116653	3938	29.6224	False	False	True	False
RPS9	chr19:54710330-54711265:+	chr19:54710592-54711265:+:end	True	True	2.07438	172	1/44	2972236	1023290	2.90459	False	False	True	False
RPS9	chr19:54710330-54711265:+	chr19:54710330-54710420:+:start	True	True	2.01519		1/61	2972236	1073219	2.76946	False	False	True	False
SNRPN,SNURF	chr15:25207356-25213078:+	chr15:25212299-25213078:+:end	True	True	15.875	124	1/71	3569084	46805	76.2543	True	False	True	True
SNRPN,SNURF	chr15:25207356-25213078:+	chr15:25207356-25212175:+:start	True	True	14.8333		2/88	3569084	56248	63.4526	False	False	True	True
STAT6	chr12:57493873-57496072:-	chr12:57494682-57496072:-:end	True	True	13	54	1/20	1588155	27420	57.9196	True	False	False	False
STAT6	chr12:57493873-57496072:-	chr12:57493873-57494628:-:start	True	True	4.33333		1/29	1588155	31782	49.9703	True	False	False	False
TM2D1	chr1:62149218-62160368:-	chr1:62149218-62152463:-:start	True	True	1.84211	141	1/30	570328	132384	4.30813	False	True	False	False
TM2D1	chr1:62149218-62160368:-	chr1:62152593-62160368:-:end	True	True	1.72727		1/46	570328	16426	34.7211	False	True	False	False
TMEM214	chr2:27260570-27261013:+	chr2:27260570-27260682:+:start	True	True	20.3333	122	2/37	924772	21286	43.4451	True	False	True	True
TMEM214	chr2:27260570-27261013:+	chr2:27260760-27261013:+:end	True	True	9.8		1/5	924772	63351	14.5976	True	False	True	True
										527.958
									average ratio	23.9981

## Sheet: SF3B1 3' css proximal DeBoever
DeBoever et al 2015 Table S3					Snaptron data
chrom	strand	gene	5'SS	3'css	3'ss	css position	Canonical reads (D to F)	Aberrant reads (D to E)	css rank (reads)	css nearness rank	nearest intronic ss	Canonical/aberrant reads	notes
chr1	+	SLC35A3	100477090	100480840	100480857	-17	198819	454	2/26	2/26	yes	437.927
chr1	-	DPH5	101460665	101458311	101458297	-14	311357	1047	3/27	4/21	second	297.38
chr1	+	PRPF38B	109235490	109236193	109236211	-18	75817	955	3/20	2/20	second	79.3895
chr1	-	MTOR	11272852	11272544	11272532	-12	174123	2117	1/5	2/5	yes	82.2499
chr1	-	ACAP3	1233749	1233509	1233494	-15	626161	925	1/23	2/23	yes	676.931
chr1	-	POLR3C	145601747	145601639	145601623	-16	388280	4591	1/12	3/15	yes	84.5742
chr1	+	TUFT1	151552209	151553405	151553417	-12	248785	215	2/21	2/21	yes	1157.14
chr1	+	SNAPIN	153631363	153631594	153631613	-19	597441	6005	2/15	3/15	yes	99.4906
chr1	+	SLC27A3	153751362	153751571	100480857	-14	659466	735	1/13	2/13	yes	897.233
												3812.31
SEC22B - gtex data not available												423.591

## Sheet: SF3B1 3'css distal Deboever
DeBoever et al 2015 Table S4 (distal css)
chrom	strand	gene	5'SS	3'css	3'ss	Position of css	Canonical reads (D to F)	Aberrant reads	Css rank /reads	Css nearness rank	nearest intronic site	Canonical/aberrant reads
chr1	+	TRMT13	100606071	100606400	100606407	-7	42307	2341	2/19	1/19	yes	18.0722
chr1	+	PRPF38B	109235490	109235804	109236211	-407	75817	2057	1/18	8/18	7th	36.858
chr1	+	PRPF38B	109238960	109240568	109241225	-657	238578	21400	1/26	9/26	4th	11.1485
chr1	+	GSTM2	110212194	110212385	110213908	-1523	659293	408	5/51	27/51	20th	1615.91
chr1	+	CAPZA1	113196284	113197099	113197086	13	410730	583	1/15	1/215	not intronic	704.511
chr1	-	CD58	117061852	117047762	117057445	9683	294614	1372	1/39	24/39	not intronic	214.733
chr1	+	PIAS3	145581565	145583935	145583914	21	415136	4330	1/26	1/26	not intronic	95.8744
chr1	-	FAM63A	150978787	150974780	150974800	20	26243	2716	1/62	4/62	not intronic	9.66237	3'ss 150974780 is the weaker of three alternative 3'ss
chr1	-	PI4KB	151274319	151271391	151271550	150	802892	1715	1/29	11/29	not intronic	468.159
chr1	+	UBAP2L	154234174	154235683	154235578	105	714000	23	6/31	5/31	not intronic	31043.5
chr1	-	CLK2	155238083	155237989	155237918	-71	178989	4490	2/219	6/26	6th	39.8639
chr1	-	CLK2	155238083	155237999	155237918	-81	178989	1103	3/219	7/26	7th	162.275
												34420.5
												2868.38

## Sheet: SF3B1 Fig 4b DeBoever
DeBoever et al Fig 4b					Snaptron data
chrom	strand	Gene	5'ss	3'css	3'ss		Canonical reads	Aberrant reads	Css rank	Css nearness rank	nearest intronic site			Canonical/aberramt reads
chr20	-	TTI1	36634598	36631196	36631179	-17	171868	6353	1/25	3/28	yes			27.053
chr19	+	FXYD5	35646515	35647729	35648323	-594	1652398	979	3/36	15/36	8th			1687.84
chr6	-	MAP3K7	91271340	91269954	91269934	-24	171750	19822	1/21	1/21	yes			8.66462
chr5	-	RP11-1280I22.1(mzb1)	138725368	138725126	138725110	-16	23484	4769	1/41	1/41	yes			4.9243
chr7	+	ORAI2	102074109	102076648	102076671	-23	57094	1673	3/36	2/41	yes			34.1267
chr12	+	PFDN5	53690336	53691607	53691633	-26	238283	643	2/21	4/21	yes			370.58
chr11	-	YIF1A	66053171	66053069	66053008	-61	1260070	956	2/14	3/14	2nd			1318.06
chr19	-	ZNF91	23556543	23545542	23545528	-14	63816	1285	6/51	1/51	yes			49.6623
chr19	+	ZNF548	57908543	57909780	57909797	-17	107841	1122	1/39	1/39	yes			96.115
														3597.03
														399.67
Genes featured in Fig 4b of DeBoever et al 2015. Couldn't find the snaptron data for one example (RP11-532F12.5, Spint1-AS1)

## Sheet: U1 Suzuki et al
Supplementary Table 17: Cryptic 5 prime alternative splicing events in Shhd subtype (n = 30)												Snaptron data (gtex)
Log(effect size) (logef) and False positive rate (FDR) was calculated using Leafcutter (See Methods)												5'css match	css reads	css rank	Nearness	canonical reads	Ratio canonical/css reads
clusterID	gene	chr	start	end	verdict	deltapsi	logef	Tumor psi	Control psi	FDR
clu_19756	SLC25A29	chr14	100759714	100764374	cryptic_fiveprime	-0.001	-0.617499	0.00179635	0.00275596	1.47e-180		yes	3025	5 /55	4/55	120590	39.8645
clu_19756	SLC25A29	chr14	100762330	100764374	cryptic_fiveprime	0.008	1.19639	0.0102099	0.00255354	1.47e-180		yes	8753	2 /18	6/18	85792	9.80144
clu_49569	AUH	chr9	93979609	93981411	cryptic_fiveprime	0.021	1.64173	0.0242901	0.00360117	3.66e-168		yes	621	2 /10	1/10	246375	396.739
clu_24080	HIRA	chr22	19385610	19392986	cryptic_fiveprime	0.131	0.769434	0.229951	0.0987976	1.02e-148		yes	36408	1 /27	3/27	194239	5.33506
clu_38582	ZBTB20	chr3	114099251	114106346	cryptic_fiveprime	0.014	2.59156	0.0141291	0.000488108	5e-142		yes	11	5 /11	3/11	5211	473.727
clu_38582	ZBTB20	chr3	114099787	114106346	cryptic_fiveprime	0.055	2.60366	0.0571498	0.00195057	5e-142		yes	66	4 /8	2/8	2683	40.6515
clu_8652	BEND7	chr10	13568221	13570483	cryptic_fiveprime	-0.002	-0.684488	0.00646973	0.00891346	4.89e-139							0	Couldn't find the canoncial 3'ss in snaptron
clu_23569	ZNF397	chr18	32823349	32825226	cryptic_fiveprime	-0.009	-0.447977	0.00499586	0.0139052	1.79e-131		yes	2423	2 /15	2/15	77563	32.0111
clu_23569	ZNF397	chr18	32836880	32837892	cryptic_fiveprime	0.025	3.26419	0.0264177	0.00179592	1.79e-131		yes	210	3 /21	4/21	61668	293.657
clu_24231	UBE2L3	chr22	21968954	21975804	cryptic_fiveprime	0.235	1.22282	0.248035	0.0129025	4.93e-123		yes	34321	1 /33	8/33	390113	11.3666
clu_30731	ZNF76	chr6	35262684	35262921	cryptic_fiveprime	0.031	0.724667	0.0337431	0.00274915	1.81e-116		yes	4687	2 /14	8/14	510487	108.916
																	1412.07
																	141 av.
