# Supplementary material for: Background splicing and genetic disease
Source: Research Square preprint supplement (doi:10.21203/rs.3.rs-92665/v1), 2020-10-15
Supplement: Supplementary file 2 [file 296463bac2756a39bd1d101c.xlsx]

## Sheet: recursive ss Kelly et al 2016
17
	RS junciton	RS junction		Gene	Intron size	5'ss	3'ss	intron readsRS position	Recursive splice site	Reads	Rank
chr1	6888374	6888375	+	CAMTA1	46546	6885271	6931816	1034007	6888373	4494	2(51)
chr1	7820663	7820664	+	CAMTA1	13925	7812594	7826518	52636	7820662	952	1(17)
chr1	8611413	8611414	-	RERE	15156	8616533	8601378	208667	8611416	1375	1(24)
chr1	8611414	8611415	-	repeat?
chr1	8658369	8658370	-	RERE	57037	8674619	8617583	110801	8658372	14	9(24)
chr1	9418368	9418369	+	SPSB1	10862	9416645	9427506	174078	9418367	29	4(15)
chr1	9915701	9915702	-	CTNNBIP1	20410	9931244	9910835	514509	9915704	40	5(41)
chr1	10158650	10158651	+	UBE4B	5511	10155655	10161165	297963	10158649	5037	1(13)
chr1	10579860	10579861	+	PEX14	40891	10555379	10596269	260153	10579859	33516	1(36)
chr1	10601109	10601110	+	PEX14	62940	10596355	10659294	206095	10601108	9759	1(34)
chr1	11245650	11245651	-	MTOR	31740	11259314	11227575	185805	11245653	3910	1(25)
chr1	15904182	15904183	+	DNAJC16	not within an intron (3'UTR)
chr1	15973332	15973333	+	DDI2	6069	15970146	15970146	125992	15973331	4439	1(3)
chr1	16194374	16194375	+	SPEN	24665	16174646	16199310	129066	16194373	1642	1(10)
chr1	16639636	16639637	-	FBXO42	9249	16641663	16632415	221783	16639639	161	4(19)
chr1	16654501	16654502	-	FBXO42	36819	16678749	16641931	111657	16654504	257	9(48)
chr1	16655274	16655275	-	FBXO42	36819	16678749	16641931	111657	16655277	2361	3(48)
chr1	17374005	17374006	-	SDHB	9059	17380442	17371384	1409006	17374008	839	2(21)
chr1	19243534	19243535	-	IFFO2	CANONICAL 3'SS
chr1	21088892	21088893	-	HP1BP3	8120	21091869	21083750	1181235	21088895	992	1(18)
chr1	21400287	21400288	-	EIF4G3	38143	21415630	21377488	361033	21400290	1263	1(41)
chr1	21544466	21544467	-	ECE1	not within an intron (3'UTR)
chr1	21601686	21601687	-	ECE1	6279	21605683	21599405	706220	21601689	492	1(6)
chr1	21658079	21658080	-	ECE1	not within an intron (5'UTR)
chr1	22103601	22103602	-	USP48	not within an intron (5'UTR)
chr1	23117992	23117993	+	EPHB2	77960	23111570	23189529	118464	23117991	9054	1(38)

## Sheet: recursive ss Gazzoli et al 2016
58 out of 71 3’RS match – 82%
66 out of 77 5’RS match – 86%
Intron	Genome	Event	Gap distance	Donor	Acceptor	snaptron reads	intron reads, Golumn I shows the number of background ss for the intron and ranking of the recursive ss where 1 it top.	read rank
1	chrX:33038317-33226522	3'RS	188204	ATgt	agAT	4	19344	15(27)
1	chrX:33038317-33142924	3'RS	104606	AGgt	agAT	4	19344	15(27)
1	chrX:33038317-33132931	3'RS	94613	TGgt	agAT	21	19344	8(27)
1	chrX:33038317-33096303	3'RS	57985	TGgt	agAT	2212	19344	1(27)
1	chrX:33038317-33066589	3'RS	28271	AGgt	agAT	0	19344	0(27)
2	chrX:32867937-32997793	3'RS	129855	AGgt	agTT	1	25141	14(21)
2	chrX:32867937-32978325	3'RS	110387	GTgt	agTT	289	25141	2(21)
2	chrX:32867937-32977886	3'RS	109948	TGgt	agTT	36	25141	4(21)
2	chrX:32867937-32897000	3'RS	29062	AGgt	agTT	24	25141	5(21)
3	chrX:32862977-32866258	3'RS	3280	AGgt	agCC	5	26679	1(3)
3	chrX:32862977-32864739	3'RS	1761	AGgt	agCC	2	26679	2(3)
4	chrX:32841504-32847873	3'RS	6368	TGgt	agGT	0	29208	0(3)
4	chrX:32841504-32843308	3'RS	1803	GAgt	agGT	0	29208	0(3)
7	chrX:32717410-32826724	3'RS	109313	TGgt	agAT	2	30322	6(15)
7	chrX:32717410-32762979	3'RS	45568	TGgt	agAT	0	30322	0(15)
7	chrX:32717410-32752402	3'RS	34991	TGgt	agAT	11	30322	3(15)
7	chrX:32717410-32752398	3'RS	34987	TGgt	agAT	43	30322	1(15)
7	chrX:32717410-32718228	3'RS	817	CAgt	agAT	2	30322	6(15)
9	chrX:32663269-32690925	3'RS	27655	AGgt	agCA	0	26939	0(6)
9	chrX:32663269-32688346	3'RS	25076	AGgt	agCA	0	26939	0(6)
9	chrX:32663269-32664799	3'RS	1529	AAgt	agCA	0	26939	0(6)
9	chrX:32663269-32663919	3'RS	649	GGgt	agCA	48	26939	1(6)
12	chrX:32613993-32631999	3'RS	18005	AGgt	agGT	70	32204	1(4)
12	chrX:32613993-32621453	3'RS	7459	AGgt	agGT	2	32204	3(4)
13	chrX:32591963-32610643	3'RS	18679	CGgt	agGT	156	32508	1(8)
15	chrX:32583998-32591132	3'RS	7133	TGgt	agGT	16	25270	4(8)
15	chrX:32583998-32586764	3'RS	2765	AGgt	agGT	84	25270	1(8)
15	chrX:32583998-32584757	3'RS	758	TGgt	agGT	20	25270	3(8)
16	chrX:32563451-32583227	3'RS	19775	GGgt	agAT	0	27059	0(7)
17	chrX:32536248-32562797	3'RS	26548	GAgt	agGT	11	21740	2(10)
17	chrX:32536248-32551776	3'RS	15527	TGgt	agGT	5	21740	3(10)
17	chrX:32536248-32545567	3'RS	9318	TAgt	agGT	3	21740	4(10)
18	chrX:32519959-32532208	3'RS	12248	AGgt	agGC	52	20661	1(5)
20	chrX:32503216-32508540	3'RS	5323	ATgt	agGA	61	19271	1(2)
21	chrX:32490426-32499222	3'RS	8795	TGgt	agTT	1	21128	3(3)
21	chrX:32490426-32498997	3'RS	8570	AGgt	agTT	99	21128	1(3)
22	chrX:32486827-32489134	3'RS	2306	AGgt	agGC	0	21066	0(1)
25	chrX:32472949-32476886	3'RS	3936	AGgt	agGT	0	25447	0(3)
26	chrX:32466755-32471857	3'RS	5101	GGgt	agAG	47	27385	1(5)
27	chrX:32459431-32460277	3'RS	845	CGgt	agGA	86	23192	1(6)
29	chrX:32430030-32430279	3'RS	248	ATgt	agGC	34	19934	2(6)
29	chrX:32430030-32430136	3'RS	106	AGgt	agGC	440	19934	1(6)
32	chrX:32404582-32407153	3'RS	2570	AGgt	agAA	0	29791	0(2)
32	chrX:32404582-32406938	3'RS	2355	AGgt	agAA	36	29791	1(2)
33	chrX:32398797-32403732	3'RS	4934	TAgt	agGT	3	33001	1(2)
34	chrX:32383316-32391083	3'RS	7766	AGgt	agGC	19	35076	3(3)
34	chrX:32383316-32384790	3'RS	1473	AGgt	agGC	281	35076	1(3)
43	chrX:32235180-32287583	3'RS	52402	AGgc	agGC	29	24054	3(8)
43	chrX:32235180-32253264	3'RS	18083	TGgt	agGC	37	24054	2(8)
44	chrX:31986631-32145384	3'RS	158752	AGgt	agGA	11	18124	8(28)
44	chrX:31986631-32032701	3'RS	46069	AGgt	agGA	7	18124	11(28)
44	chrX:31986631-32011526	3'RS	24894	AGgt	agGA	35	18124	4(28)
44	chrX:31986631-31989924	3'RS	3292	TGgt	agGA	13	18124	6(28)
45	chrX:31950344-31980093	3'RS	29748	TGgt	agGC	2	20247	5(6)
45	chrX:31950344-31968950	3'RS	18605	AGgt	agGC	0	20247	0(6)
45	chrX:31950344-31957379	3'RS	7034	AGgt	agGC	31	20247	2(6)
47	chrX:31893490-31895495	3'RS	2004	AGgt	agGT	5	26233	2(5)
50	chrX:31792309-31820915	3'RS	28605	AGgc	agCT	39	28622	1(6)
50	chrX:31792309-31802421	3'RS	10111	AGgt	agCT	21	28622	3(6)
51	chrX:31747865-31770558	3'RS	22692	TGgt	agGC	100	36212	1(6)
53	chrX:31676261-31694324	3'RS	18062	CCgt	agCA	34	29237	1(6)
53	chrX:31676261-31691642	3'RS	15380	AAgt	agCA	29	29237	2(6)
53	chrX:31676261-31679560	3'RS	3298	AGgt	agCA	0	29237	0(6)
56	chrX:31515061-31515196	3'RS	134	AAgt	agGT	129	33882	1(3)
59	chrX:31462744-31494069	3'RS	31325	AGgt	agGC	22	34944	1(2)
62	chrX:31279133-31284927	3'RS	5793	GGgt	agCC	56445	56445	Recursive site is the 3'ss of intron 62
62	chrX:31279133-31283560	3'RS	4426	TGgt	agCC	99	56445	1(11)
63	chrX:31241238-31265811	3'RS	24572	TGgt	agCT	1929	130955	1(23)
67	chrX:31201021-31216719	3'RS	15697	AGgt	agGC	62	120009	2(13)
74	chrX:31165635-31166438	3'RS	802	TGgt	agGA	247	183429	1(7)
77	chrX:31144790-31150600	3'RS	5809	AGgt	agGA	82	68346	1(46)
1	chrX:33227925-33229399	5'RS	1473	TTgt	agAT	1	19344	16(27)
1	chrX:33177714-33229399	5'RS	51684	TTgt	agGA	290	19344	2(27)
1	chrX:33159412-33229399	5'RS	69986	TTgt	agCA	0	19344	0(27)
1	chrX:33143138-33229399	5'RS	86260	TTgt	agAT	9	19344	4(27)
1	chrX:33096464-33229399	5'RS	132934	TTgt	agGA	1584	19344	1(27)
2	chrX:33036851-33038256	5'RS	1404	AGgt	agTT	0	25141	0(20)
2	chrX:33015747-33038256	5'RS	22508	AGgt	agCT	11	25141	5(20)
2	chrX:32978464-33038256	5'RS	59791	AGgt	agGT	304	25141	1(20)
2	chrX:32897097-33038256	5'RS	141158	AGgt	agGC	0	25141	0(20)
3	chrX:32866362-32867845	5'RS	1482	TGgt	agAA	1	26679	2(4)
3	chrX:32863793-32867845	5'RS	4051	TGgt	agGT	1	26679	2(4)
7	chrX:32826952-32827610	5'RS	657	AGgt	agCC	59	30322	5(21)
7	chrX:32826743-32827610	5'RS	866	AGgt	agGA	156	30322	2(21)
7	chrX:32823659-32827610	5'RS	3950	AGgt	agTT	0	30322	0(21)
7	chrX:32822566-32827610	5'RS	5043	AGgt	agAG	177	30322	1(21)
7	chrX:32752559-32827610	5'RS	75050	AGgt	agGC	105	30322	3(21)
9	chrX:32664043-32715987	5'RS	51943	AGgt	agGT	1	26939	5(8)
10	chrX:32662973-32663081	5'RS	107	AGgt	agTT	1	3488	1(1)
12	chrX:32632160-32632420	5'RS	259	AGgt	agAA	2	32204	2(4)
12	chrX:32632064-32632420	5'RS	355	AGgt	agGC	0	32204	0(4)
12	chrX:32632016-32632420	5'RS	403	AGgt	agAA	74	32204	1(4)
13	chrX:32600788-32613874	5'RS	13085	AGgt	agAT	17	32508	3(12)
15	chrX:32591167-32591647	5'RS	479	CCgt	agGC	37	25270	2(4
15	chrX:32586890-32591647	5'RS	4756	CCgt	agTT	79	25270	1(4)
15	chrX:32584945-32591647	5'RS	6701	CCgt	agAT	11	25270	3(4)
16	chrX:32583315-32583819	5'RS	503	AGgt	agAC	1	27059	2(2)
17	chrX:32562901-32563276	5'RS	374	AGgt	agTA	2058	21740	1(7)
17	chrX:32551926-32563276	5'RS	11349	AGgt	agGG	6	21740	4(7)
17	chrX:32545703-32563276	5'RS	17572	AGgt	agCA	3	21740	6(7)
18	chrX:32532339-32536125	5'RS	3785	ATgt	agTG	36	20661	1(3)
20	chrX:32508669-32509394	5'RS	724	AGgt	agAA	62	19271	1(3)
21	chrX:32499062-32503036	5'RS	3973	AAgt	agGC	72	21128	1(2)
21	chrX:32490432-32503036	5'RS	12603	AAgt	tgAT	0	21128	0(2)
22	chrX:32489392-32490281	5'RS	888	AGgt	agAC	7	21066	1(2)
26	chrX:32471940-32472779	5'RS	838	AGgt	agGA	29	27385	1(3)
27	chrX:32460395-32466573	5'RS	6177	AAgt	agAT	1	23192	3(3)
27	chrX:32459600-32466573	5'RS	6972	AAgt	agAG	114	23192	1(3)
29	chrX:32437160-32456358	5'RS	19197	AGgt	agAT	0	19934	0(5)
29	chrX:32430488-32456358	5'RS	25869	AGgt	agGA	9	19934	2(5)
29	chrX:32430180-32456358	5'RS	26177	AGgt	agAG	73	19934	1(5)
30	chrX:32422551-32429869	5'RS	7317	AGgc	agAT	2	20064	1(1)
32	chrX:32407220-32407618	5'RS	397	TGgt	agGC	6	29791	2(2)
33	chrX:32403827-32404427	5'RS	599	AGgt	agAG	0	33001	0(0)
34	chrX:32391163-32398627	5'RS	7463	AGgt	tgAT	0	35076	0(4)
34	chrX:32391154-32398627	5'RS	7472	AGgt	agAG	13	35076	3(4)
34	chrX:32384877-32398627	5'RS	13749	AGgt	agGC	228	35076	1(4)
40	chrX:32360967-32361251	5'RS	283	AGgt	agAT	3201	28988	1(2)
42	chrX:32308624-32328199	5'RS	19574	AGgt	agAA	0	24024	0(4)
43	chrX:32302550-32305646	5'RS	3095	GGgt	agAG	138	24045	1(14)
43	chrX:32300713-32305646	5'RS	4932	GGgt	agCA	5	24045	5(14)
43	chrX:32287674-32305646	5'RS	17971	GGgt	agTG	61	24045	2(14)
43	chrX:32259793-32305646	5'RS	45853	GGgt	agAA	13	24045	4(14)
43	chrX:32253321-32305646	5'RS	52324	GGgt	agAT	29	24045	3(14)
44	chrX:32213994-32235033	5'RS	21038	AGgt	agCA	121	18124	2(46)
44	chrX:32204071-32235033	5'RS	30961	AGgt	agAT	812	18124	1(46)
44	chrX:32187196-32235033	5'RS	47836	AGgt	agGT	8	18124	10(46)
44	chrX:32145531-32235033	5'RS	89501	AGgt	agAG	21	18124	4(46)
44	chrX:32106615-32235033	5'RS	128417	AGgt	agTC	40	18124	3(46)
44	chrX:32099434-32235033	5'RS	135598	AGgt	agTA	9	18124	8(46)
45	chrX:31980251-31986456	5'RS	6204	AGgt	agGA	51	20247	1(4)
45	chrX:31957456-31986456	5'RS	28999	AGgt	agGA	32	20247	2(4)
47	chrX:31946313-31947713	5'RS	1399	AGgt	agAT	0	26233	0(6)
47	chrX:31928802-31947713	5'RS	18910	AGgt	agAG	6	26233	3(6)
50	chrX:31821027-31838092	5'RS	17064	CTgt	agGG	44	28622	1(6)
51	chrX:31770641-31792077	5'RS	21435	AGgt	agGG	75	36212	1(8)
53	chrX:31694386-31697492	5'RS	3105	AGgt	agGA	67	29237	1(6)
53	chrX:31691721-31697492	5'RS	5770	AGgt	agAT	11	29237	5(6)
53	chrX:31687955-31697492	5'RS	9536	AGgt	agAA	50	29237	2(6)
59	chrX:31494156-31496223	5'RS	2066	AGgt	agAG	19	34944	1(6)
62	chrX:31303503-31341715	5'RS	38211	AAgt	agTT	28	35473	2(14)
62	chrX:31288091-31341715	5'RS	53623	AAgt	agGC	286	35473	1(14)
63	chrX:31265885-31279072	5'RS	13186	AGgt	agTT	2160	130955	1(24)
67	chrX:31221511-31222078	5'RS	566	TTgt	agTC	153	120009	2(13)
67	chrX:31217814-31222078	5'RS	4263	TTgt	agGT	90	120009	4(13)
67	chrX:31213762-31222078	5'RS	8315	TTgt	agTC	1039	120009	1(13)
77	chrX:31150750-31152219	5'RS	1468	AGgt	agAT	137	106773	2(14)
77	chrX:31144916-31152219	5'RS	7302	AGgt	agCA	79	106773	4(14)

## Sheet: Summary sheet
Recursive splice sites	Snaptron match	Top rank
Kelly et al 2016 3'RS	20/20	12/20
Gazzoli et al 2016 3'RS	58/71	26/36
Gazzoli et al 2016 5'RS	66/77	27/36
