# Supplementary material for: Background splicing and genetic disease
Source: Research Square preprint supplement (doi:10.21203/rs.3.rs-92665/v1), 2020-10-15
Supplement: Supplementary file 3 [file e67c1b56e9f6cf305b8751aa.xlsx]

## Sheet: 5'css
syndrome of disease	Gene	Link to DBASS and reference	Chromosome	Mutated 5'ss (hg19)	mutation	Activated 5' css (hg19)	3’ss (hg19)	distance of css from normal ss	css observed in snaptron	Read ranking	nearness ranking	Notes	exon skipping	Normal reads	css reads or highest bss read within 1000 bp of normal splice site (when there is not a match to the css)	Single exon skip reads	Double exon skip reads	Notes	reads of bss>css
early chilhood Leigh syndrome	ECHS1	http://www.dbass.org.uk/DBASS5/viewsplicesite.aspx?id=775	10	135186749	CGGg tga(g>a)t	135186738	135184262	11	ü	1(10)	2(10)		no	1249642	624	0	0	first intron	None
11 beta-hydroxylase deficiency	CYP11B1	http://www.dbass.org.uk/DBASS5/viewsplicesite.aspx?id=627	8	143958097	AC(G>A)gtgagg	143958143	143957812	-46	ü	2(2)	2(2) css second nearest of the snaptron ss to the 5'ss	The css matches a snaptron bss with the second most reads. The strongest snaptron ss at 143958102 (2635 reads) would be expected to be inactivated by the 5'ss mutation (see column F). Skipping not apparently tested.	nr	60034	3	13	0		2635 (-5). Mutation would inactivate this site
17alpha-hydroxylase deficiency	CYP17A1	http://www.dbass.org.uk/DBASS5/viewsplicesite.aspx?id=806	10	104596821	ATGg(t>c)aagt	104596470	104595150	351	ü	1(2)	2(2)		no	91316	16	0	0	first intron	None
Acute intermittent porphyria	HMBS	http://www.dbass.org.uk/DBASS5/viewsplicesite.aspx?id=268	11	118960471	AAg(t>c)aagagt	118960486	118960699	15	ü	1(7)	3(7)	The major experimental effect of the mutation was to activate css 118960486. Skipping may have occurred weakly but was not commented upon.	nr	639984	1760	731	1		None
Adenosine deaminase deficiency	ADA	http://www.dbass.org.uk/DBASS5/viewsplicesite.aspx?id=224	20	43249658	GCTG(g>a)tgagt	43249654	43249043	4	ü	4(7)	1(7)	The strongest predicted bss at position 43249662 (308 reads) would be expected to be inactivated by the 5'ss mutation (see column F).	no	711864	4	0	1		308 (-4), 26 (+258), 1 (+185). Css-4 would be inactivated by the mutation.
Afibrinogenemia	FGA	http://www.dbass.org.uk/DBASS5/viewsplicesite.aspx?id=40	4	155508663	GAG(g>t)taagta	155508729, 155508699,155508659	155508071	-66,-36, 4	üûü	4,0,3 (5)	3,0,1 (5)	Multiple css reported, the major one was css 155508659, which is identified by snaptron as a bss with the third most reads out of a total of five. The two snaptron bss with the first and second most reads (not identified as css) are further away. Snaptron has most reads for a double exon skip (not detected)	no	1782165	1,0,3	1	11		16 (+467), 14 (+124)
Afibrinogenemia	FGB	http://www.dbass.org.uk/DBASS5/viewsplicesite.aspx?id=2	4	155490952	CTG(g>t)tatgtg	155490928, 155490912, 155490846, 155490956	155491570	-106,-40,-24, 4	üüüü	7,1,3,4 (11)	7,6,4,1 (11)	Multiple css reported, all identified by snaptron which identifies a total of 12 candidate css. Skipping also reported in 17% of cases - remainder css activation.	yes	4301665	39	4	1		None
Alpha mannosidase	MAN2B1	http://www.dbass.org.uk/DBASS5/viewsplicesite.aspx?id=36	19	12772073	AGg(t>g)cagtgc	12772085	12769325	-12	ü	1(7)	3(7)	Snaptron also supports exon skipping.	nr	818762	232	3673	2		None
Alpha-1 antitrypsin deficiency	SERPINA1	http://www.dbass.org.uk/DBASS5/viewsplicesite.aspx?id=64	14	94848928	AAG(g>t)taaggt	94849012	94847479	-84	ü	1(14)	5(14)	The css matches a snaptron bss with the most reads, although there are even more reads for exon skipping.	nr	8624073	250	2468	1		None
Alpha-thalassemia	HBA1	http://www.dbass.org.uk/DBASS5/viewsplicesite.aspx?id=70	16	226811	AGA(G>A)gtgagg	226762	226927	-48	ü	1(18)	10(18)		no	2450979	8322	0	0	first intron	None
Alpha-thalassemia	HBA2	http://www.dbass.org.uk/DBASS5/viewsplicesite.aspx?id=818	16	223007	GAG(g>a)tg agg	222958	223123	-49	ü	1(6)	5(6)		no	96224	528	0	0	first intron	None
Alzheimer disease	PSEN1	http://www.dbass.org.uk/DBASS5/viewsplicesite.aspx?id=15	14	73637756	GCT(g)tacgta	73637587	73640273	-169, 3	üü	2,3(6)	2,4(6)	Two of six similar strength css identified by snaptron. Nearest css (73637753) possibly inactivated by the mutation. Ratios of the different mutant transcripts not clear. Double exon skip not tested as outside the RT-PCR primers.	yes	307556	1	15	13		2(+198)
Androgen insensitivity syndrome and Complete androgen insensitivity syndrome	AR	http://www.dbass.org.uk/DBASS5/viewsplicesite.aspx?id=54	X	66931532	CTG( g>t)taagg	66931409	66937319	-123	ü	1(3)	2(3)	No skips detected	no	117428	17	6	10		None
Ataxia-telangiectasia	ATM	http://www.dbass.org.uk/DBASS5/viewsplicesite.aspx?id=183	11	108158166	Ggt(a>g)gagtt	108158249	108158326	83	ü	1(2)	1(2)	only the single skip but not double skip would be tested with the RT-PCR primers	no	5718	940	0	112		None
Autism	SHANK3	http://www.dbass.org.uk/DBASS5/viewsplicesite.aspx?id=688	22	51153476	AGC(g)taaggg	51153553	51154096	76	ü	1(2)	2(2)		nr	170325	8	0	0		None
Autosomal dominant optic atrophy	OPA1	http://www.dbass.org.uk/DBASS5/viewsplicesite.aspx?id=654	3	193372817	AGA(G>A)gttagg	193372842	193374868	25	ü	1(5)	3(5)		no	584868	12344	211	2		None
Autosomal dominant polycystic kidney disease	PKD1	http://www.dbass.org.uk/DBASS5/viewsplicesite.aspx?id=799	16	2142954	GC(G>A)gtacgg	2142837	2142594	117	ü	1(14)	3(14)	Authors use of minigene constructs apparently caused aberrant exon skipping even for wild type constructs so that only the css activation was interpretable.	nr	374403	944	34455	8		None
Autosomal dominant pseudohypoaldosteronism, type I	MR (NR3C2)	http://www.dbass.org.uk/DBASS5/viewsplicesite.aspx?id=421	4	149075701	CCA(G>T)gtagga	149075711	149073765	-10	ü	1(2)	1(2)	Snaptron favours an exon skip	nr	46226	52	524	0		None
Autosomal recessive hypercholesterolemia	ARH (LDLRAP1)	http://www.dbass.org.uk/DBASS5/viewsplicesite.aspx?id=19	1	25883759	TGg(t>g)cagcgg	25883681, 25883725	25889134	-78,-34	üû	1,0 (4)	2,0(4)	A major css 25883681 and minor css 25883725 identified by experiment. Snaptron identifed 4 css in total of which css 25883681 had the most reads, 25883725 not identified. 164 reads for a triple skip (not tested).	no	285638	19	4	0, 164(triple)		None
Autosomal recessive spastic paraplegia	SPG11	http://www.dbass.org.uk/DBASS5/viewsplicesite.aspx?id=652	15	44912387	GCC(A>G)Ggtatt	44912322	44907765	65	ü	1(1)	1(1)	However, snaptron also indicates exon skipping, which wasn't apparently tested	nr	165016	2515	4179	109		None
Autosomal recessive woolly hair	LIPH	http://www.dbass.org.uk/DBASS5/viewsplicesite.aspx?id=758	3	185234854	GCAgtga (g>t)t	185234847	185232310	7	ü	1(5)	2(5)		no	65050	350	149	22		None
Beta-thalassemia	HBB	http://www.dbass.org.uk/DBASS5/viewsplicesite.aspx?id=244	11	5248159	GCA(G>C)gttggt	5248197,5248175,5248147	5248030	-38,-16,12	üüü	1,3,6 (36)	9,5,3(36)		no	91843053	9370, 4047, 504	0	0	first intron	None
Beta-thalassemia	HBB	http://www.dbass.org.uk/DBASS5/viewsplicesite.aspx?id=270Faustino et al., 1998 PMID: 9427726	11	5247806	AGGgtg(ag)tc	5247941, 5247759	5246957	-135, 47	üü	3,13,(38)	21,8 (38)	Snaptron also indicates exon skipping, which was observed. aberrant transcripts have similar ratio	yes	110191509	43, 10	60	0		459 (+533), 61(-135)
Bethlem myopathy	COL6A1	http://www.dbass.org.uk/DBASS5/viewsplicesite.aspx?id=53	21	47404384	GGG(g>a)tgagtg	47404318	47406439	-66	ü	1(4)	3(4)		no	1877384	55	15	1		None
Breast cancer cell line	EP300	http://www.dbass.org.uk/DBASS5/viewsplicesite.aspx?id=269	22	41572533	AGg(t>a)aggcac	41572561	41572776	28	ü	1(4)	2(4)	Snaptron indicates single exon skipping as the major effect.	nr	500034	4	150	0		None
Brugada syndrome	SCN5A	http://www.dbass.org.uk/DBASS5/viewsplicesite.aspx?id=122	3	38595769	ggt(gggt)ataaag	38595865	38593050	-96	ü	1(3)	3(3)		nr	23197	210	9	0		None
C4B deficiency	C4B	http://www.dbass.org.uk/DBASS5/viewsplicesite.aspx?id=661	6	31997116	GAG(g> a)tgaggg	31997123	31997342	7	ü	1(5)	1(5)		nr	222236	17	0	0		None
Capillary malformation-arterovenous malformation	RASA1	http://www.dbass.org.uk/DBASS5/viewsplicesite.aspx?id=765	5	86682721	GGG(g >t)tatgt	86682740	86685209	19	ü	1(5)	1(5)	66 reads for a triple skip (not tested)	yes	515671	19	31	0, 66 (triple)		None
Cerebrotendinous xanthomatosis	CYP27A1	http://www.dbass.org.uk/DBASS5/viewsplicesite.aspx?id=13	2	219678911	CTG(C>A)Ggtagg	219678822	219679102	-89	ü	1(5)	5(5)		no	499318	46	4	0		None
Childhood absence epilepsy and febrile seizures	GABRG2	http://www.dbass.org.uk/DBASS5/viewsplicesite.aspx?id=779	5	161531033	CCGg(t>g)aaga	161531086	161569169	53	ü	1(1)	1(1)	Snaptron has 0 reads for a single skip but 109 reads for a 5 exon skip (upstream), not tested.	no	97207	15	0	0, 109(five exon skip)		None
Chronic granulomatous disease and Familial platelet disorder with predisposition to acute myelogenous leukemia	EDARADD	http://www.dbass.org.uk/DBASS5/viewsplicesite.aspx?id=754	1	236572575	A TG(g>a)taggt	236572524, 236572579	236577559	-59, 4	ûû	0,0(3)	0(3)	Minigene analysis of a single intron	nr	236572575	0(11)	62	0		11 (+845),3(+759), 2(+943)
Chronic myelomonocytic leukemia	ATRX	http://www.dbass.org.uk/DBASS5/viewsplicesite.aspx?id=169	x	76953070	AGg(t>c)tggtt	76953027	76952193	43	ü	1(2)	1(2)	Skipping also detected, in agreement with snaptron. Ratio of css to skip not clear	yes	269857	90	68	0		None
Colorectal carcinoma	TP53	http://www.dbass.org.uk/DBASS5/viewsplicesite.aspx?id=101	17	7578370	tga(g>c)cagctg	7578416	7578290	-46	ü	1(6)	1(6)		nr	535301	46	0	0		None
Colorectal carcinoma	MSH2	http://www.dbass.org.uk/DBASS5/viewsplicesite.aspx?id=33	2	47657081	TGA(A>G)Ggtaac	47657033	47672686	-48	ü	1(4)	2(4)	Skipping also detected (weaker than css activation). Double exon skip not tested.	yes	392656	202	46	150		None
Congenital acetylcholinesterase deficiency	COLQ	http://www.dbass.org.uk/DBASS5/viewsplicesite.aspx?id=8	3	15495335	Ggt(a>g)gggatg	15497435, 15497424	15493221	-2100, -2089	üû	2,0(9)	9(9)	Primary effect of the 5'ss mutation is to cause single exon skipping, the reported upstream css that are also involved in skipping are very minor. In large agreement with snaptron. Double exon skip not tested. This example is unusual in that the css are very far from the mutation, see also Appendix 1.	yes	41703	6, 0	269	93		Details in Appendix 1
Congenital goitrous hypothyroidism	TG	http://www.dbass.org.uk/DBASS5/viewsplicesite.aspx?id=733	8	133894215	CAG(g >a)tgagt	133894160	133894713	-55	û	0(3)	0(3)	Paper reports equal amounts of exon skipping and css -55 use. Minigene analysis	yes	409966	0(8)	7	1		8(+258), 3(+50), 1(-47)
Congenital thrombotic thrombocytopenic purpura/hemolytic uremic syndrome (TTP/HUS)	TCIRG1	http://www.dbass.org.uk/DBASS5/viewsplicesite.aspx?id=44	11	67808856	gtg(a>t)gttggg	67808814	67809219	-42	ü	1(8)	4(8)	Strongest by far of eight css identified by snaptron. Skipping not tested	nr	488630	20184	3	217		None
Cowden's disease	PTEN	http://www.dbass.org.uk/DBASS5/viewsplicesite.aspx?id=5	10	89653867	A AG(g>a)taa ga	89653862	89685269	-5	ü	2(4)	1(4)		nr	90698	5	3	0		8(-225)
Craniosynostosis	FGFR2	http://www.dbass.org.uk/DBASS5/viewsplicesite.aspx?id=788	10	123276832	C AG(g>a)tatat	123276883	123274834	-51	ü	1(3)	1(3)	Authors report css and the enhanced skipping of exon 9, in agreement with snaptron reads.	yes	103930	2607	1335	135		None
Crigler-Najjar syndrome, type I	UGT1A1	http://www.dbass.org.uk/DBASS5/viewsplicesite.aspx?id=94	2	234669798	CAG(g>c)tgtgta	234669657	234675679	-141	ü	1(3)	2(3)	The 3'ss 234675679 undergoes a lot of alternative splicing	nr	70776	5	0	0		None
Cushing's syndrome	PRKAR1A	http://www.dbass.org.uk/DBASS5/viewsplicesite.aspx?id=16	17	66508690	CCA(G>A)gtgagt	66508637	66511534	-53	ü	3(13)	3(13)		nr	722815	4863	0	0		218896(ass that was not analysed), 20648 (+31)
Cystic fibrosis	CFTR	http://www.dbass.org.uk/DBASS5/viewsplicesite.aspx?id=7	7	117171169	AAGgt(a>g)atac	117171076	117174329	-93	ü	1(2)	1(2)	Weaker exon skipping also observed.	yes	23226	28	15	9		None
Cystinosis	CTNS	http://www.dbass.org.uk/DBASS5/viewsplicesite.aspx?id=356	17	3559881	(CAAGgt acggccttgc ctgccctaca t)	3558621	3559969	-1260	ü	1(1)	1(1)	Deletion of the 5'ss causes skipping to both an upstream 5'ss and an upstream 5'css. These two sites have the most reads and are the nearest to the normal 5'ss. Ratio of these transcripts is not clear	yes	200448	4	19	1		None
Danon disease	LAMP2	http://www.dbass.org.uk/DBASS5/viewsplicesite.aspx?id=606	X	119575584	CAG(g>c)taagaa	119575599	119565318	-15	û	0(4)	na	The css is unusual (GA) and would have been filtered from the snaptron database. A css at 119575624 of snaptron has the most reads (24). However, css activation was minor compared to exon skipping (both single and double). There are two further alternative 3' ss and these also participated in either single or double skipping as a result of the 5'ss mutation. Good match between the observed exon s…	yes	953995	0 (24)	60	80		Details in Appendix 1
Deafness, nonsyndromic	DFNA1	http://www.dbass.org.uk/DBASS5/viewsplicesite.aspx?id=392	5	140903709	AAG(g>t)taagta	140903705	140896576	4	ü	1(1)	1(1)		nr	855533	97	164	0		None
Diabetes susceptibility	INS	http://www.dbass.org.uk/DBASS5/viewsplicesite.aspx?id=237	11	2182397	tct[ttgc]gttcca	2182371	2182219	30	ü	1(8)	3(8)	Most reads by far	no	11501620	75286	0	0	first intron	None
Diabetes susceptibility	HNF1A	http://www.dbass.org.uk/DBASS5/viewsplicesite.aspx?id=701	12	121432209	CAC(G>A)gtaagt	121432197, 121432216	121434064	-12, 7	üü	1,2(2)	2,1(2)	121432197 major css, then 121432216, then weak exon skipping. The css were the only ones within 1000 bp identified by snaptron. Snaptron did not identify any skip reads but nevertheless the overall experimental and snaptron reads correlate well.	yes	15872	24,6	0	0		None
Diffuse large B-cell lymphoma	PRDM1	http://www.dbass.org.uk/DBASS5/viewsplicesite.aspx?id=235	6	106536325	AGA(G>A)gtaagc	106536425	106543489	100	ü	1(3)	1(3)	Strongest by far of three css identified by snaptron	no	77653	433	5	0		None
Diffuse palmoplantar keratoderma	KRT1	http://www.dbass.org.uk/DBASS5/viewsplicesite.aspx?id=732	12	53070842	CA(G>C) gtatgt	53070788	53070280	54	ü	2(9)	2(9)		yes	4714944	72	82	1		162(+685)
Dihydropyrimidine dehydrogenase deficiency	DPYD	http://www.dbass.org.uk/DBASS5/viewsplicesite.aspx?id=55	1	98039315	AAG(g>t)tacagt	98039456	98015301	-141	ü	1(1)	1(1)	Only ss read within 1000 bp of the 5'ss. The large intron (24kb) does have higher reads for splice sites at a greater distances from the 5'ss.	no	160584	33	9	2		None
Dubin-Johnson syndrome	MRP2	http://www.dbass.org.uk/DBASS5/viewsplicesite.aspx?id=62	10	101559132	GTG/(a>g)gtctcc	101559108	101560142	-20	ü	1(7)	3(7)	Strongest by far of 7 css within 1000 bp of the 5'ss. Skips not seen.	no	103661	723	22	227		None
Dyschromatosis symmetrica hereditaria	ADAR	http://www.dbass.org.uk/DBASS5/viewsplicesite.aspx?id=831	1	154573516	TC (G>A)gtaag a	154573706	154571062	-190	ü	1(6)	3(6)	Single exon skip ruled out, not clear if double skip tested	no	884711	2770	5	78		None
Ectodermal dysplasia-skin fragility (McGrath) syndrome	PKP1	http://www.dbass.org.uk/DBASS5/viewsplicesite.aspx?id=22	1	201292318	CTG(g>a)tgagtg	201292273	201293555	-45	(û)	0(2)	na	Snaptron would favour exon skipping. The cross is in brackets because this 5' css is detected in snaptron at relatively high levels. It has 19 reads to a 3'ss within the intron at position 201293006, which is the third highest read out of 69 low level 5'ss splicing events that initiate within the two 3'ss that flank the mutated 5'ss. The same 5'css has no splicing reads to the intronic 3'ss and i…	no	208193	1	12	2		2(+810), 1(-35)
Ehlers-Danlos syndrome	COL1A2	http://www.dbass.org.uk/DBASS5/viewsplicesite.aspx?id=118	7	94041434	GTC(g>c)taagt	94041426	94041895	-8	ü	1(4)	2(4)		no	5622275	79	14	11		None
Ehlers-Danlos syndrome	COL3A1	http://www.dbass.org.uk/DBASS5/viewsplicesite.aspx?id=705	2	189870184	TGA/(g>a)tagca	189870214	189870931	30	ü	1(4)	2(4)		nr	3069340	42	9	17		None
Ehlers-Danlos syndrome	COL5A1	http://www.dbass.org.uk/DBASS5/viewsplicesite.aspx?id=691	9	137653825	A GG(g>a)tag /gt	137653829	137655538	4	û	0(8)	na	Reported css doesn't match any of 8 snaptron bss. These are all fairly low reads, nearest is 280 bases upstream. RT-PCR primers should have seen both single and double exon skips	no	524172	0(12)	10	27		12(+865), 9(+860), 5(+457), 3(+376)
Ehlers-Danlos syndrome	HPRT2(CDC73)	http://www.dbass.org.uk/DBASS5/viewsplicesite.aspx?id=693	1	193094348	GCT(g>c )taa/gt	193094348	193094352	4	û	0(1)	na	Snaptron favours exon skipping, which is in accord with the author's results. The css identified by snaptron is at 193094345, which would be inactivated by the 5'ss mutation.	yes	355083	0(10)	1010	0		10(-3)
Elliptocytosis	EPB41	http://www.dbass.org.uk/DBASS5/viewsplicesite.aspx?id=365; PMID: 10688845	1	29438961	TCA(G>A)gtggga	29438890	29442210	-71	û	0(3)	na	Paper also detected exon skipping which is strongly indicated by snaptron. Ratio of the aberrant transcripts not clear, double exon skip possibly not tested.	yes	630259	0 (84)	7625	2290		84(+377), 42(+147), 13(+414) - primary effect of this mutation might be exon skipping.
Ellis-van Creveld syndrome	EVC	http://www.dbass.org.uk/DBASS5/viewsplicesite.aspx?id=213	4	5795445	TGA/(g>t)tacagc	5795560	5798748	115	ü	1(3)	1(3)	paper also reports exon skipping (marginally stronger), which is in agreement with snaptron. Possible double exon skipping not tested.	yes	67043	108	462	93		None
Epidermolysis bullosa	KRT5	http://www.dbass.org.uk/DBASS5/viewsplicesite.aspx?id=91	12	52913525	AAG(g>a)tgagct	52913591	52912945	-66	ü	3(10)	4(10)	stronger sites further away	no	5357325	82	1	0		1094(+415), 200(+207)
Epidermolysis bullosa	ITGB4	http://www.dbass.org.uk/DBASS5/viewsplicesite.aspx?id=51	17	73747193	ACC(g>a)taagaa	73747142	73748254	-51	ü	2(3)	1(3)		nr	512053	42	0	0		1527 (+127)
Epidermolysis bullosa	COL7A1	http://www.dbass.org.uk/DBASS5/viewsplicesite.aspx?id=185	3	48611122	CC G(g>c)tgag t	48611097	48610991	25	ü	1(9)	2(9)		no	224634	1113	64	3		None
Epidermolysis bullosa	KRT14	http://www.dbass.org.uk/DBASS5/viewsplicesite.aspx?id=23	17	39740011	AAG(g>a)tgggtg	39740029	39739929	-18	û	0(9)	na	Css not detected, it is non-canonical and would have been filtered out.	nr	8026437	0(50)	21	0		na
Epidermolysis bullosa	LAMB3	http://www.dbass.org.uk/DBASS5/viewsplicesite.aspx?id=761	1	209803081	TC Tgtga(g>a) t	209803150, 209803159	209801536	-78, -69	üû	4,0(5)	4,0(5)	activation of css 209803150 was the major event	yes	825871	1,0	1	2		2962 (+931), 2(+121), 2(-6)
Epidermolysis bullosa, junctional	LAMA3	http://www.dbass.org.uk/DBASS5/viewsplicesite.aspx?id=586	18	21501550	AAG(g>a)taagat	21501489	21508086	-61	ü	1(2)	1(2)	Snaptron has 9 reads for a triple exon skip, not tested.	no	263622	4	0	0, 9(triple)		None
Episodic Ataxia Type 2	CACNA1A	http://www.dbass.org.uk/DBASS5/viewsplicesite.aspx?id=599	19	13386663	Cgt[t]aagtc	13386695	13373648	-32	ü	1(1)	1(1)		no	66809	16	0	0		None
Fabry disease	GLA	http://www.dbass.org.uk/DBASS5/viewsplicesite.aspx?id=298	X	100662697	TCA(G>C)gtatca	100662683	100658974	14	ü	2(8)	1(8)		no	513500	72	0	0	first intron	96(-419)
Factor 5 and Factor 8 deficiency	MCFD2	http://www.dbass.org.uk/DBASS5/viewsplicesite.aspx?id=275	2	47136161	tac(g>a)tattca	47136000	47135109	161	ü	1(5)	5(5)	Css activation minor compared to exon skipping	yes	791409	127	71899	0		None
Factor 5 deficiency	F5	http://www.dbass.org.uk/DBASS5/viewsplicesite.aspx?id=29	1	169519038	ACA(G>T)gtattt	169519073	169515831	-35	ü	1(1)	1(1)		no	51480	12	15	1		None
Factor 7 deficiency	F7	http://www.dbass.org.uk/DBASS5/viewsplicesite.aspx?id=174	13	113771911	Ggt(gggt)accact	113771948	113772726	33	û	0(5)	na		nr	35596	0(1307)	0	0		1307(+485), 4(185)
Familial gastric cancer	CDH1	http://www.dbass.org.uk/DBASS5/viewsplicesite.aspx?id=289	16	68845763	GA(G> T)gtcagg	68845770	68846037	7	ü	1(8)	1(8)		no	761730	32	4	4		None
Familial hypercholesterolemia	LDLR	http://www.dbass.org.uk/DBASS5/viewsplicesite.aspx?id=285	19	11224439	TGGgtgc(g> a)t	11224505	11226769	66	ü	1(9)	4(9)	equal ratio of skip and css, double skip not seen.	yes	531186	37	234	131		None
Familial hypobetalipoproteinemia	APOB	http://www.dbass.org.uk/DBASS5/viewsplicesite.aspx?id=395	2	21256170	CA( G>A)gtatct	21256130	21255454	40	û	0(1)	na	No reads for the css	no	382011	0(86)	0	0		86(-8)
Familial isolated growth hormone deficiency	GH1	http://www.dbass.org.uk/DBASS5/viewsplicesite.aspx?id=66	17	61995119	GGG(g>c)tgaggg	61995192	61994867	-73	ü	1(10)	4(10)		nr	1899402	703	16	1756		None
Familial platelet disorder with predisposition to acute myelogenous leukemia	CYBA	http://www.dbass.org.uk/DBASS5/viewsplicesite.aspx?id=168	16	88717363	gtg(agtg)cacgtc	88717280	88714523	79	ü	4(16)	6(16)		no	2714319	91	0	0	first intron	2769(+703), 190(+13), 139(-153)
Familial platelet disorder with predisposition to acute myelogenous leukemia	RUNX1/AML1	http://www.dbass.org.uk/DBASS5/viewsplicesite.aspx?id=367	21	36252853	Ggt(a)cgttat	36252876	36231876	-23	ü	1(5)	2(5)		nr	360678	177	62	1592		None
Familial platelet disorder with predisposition to acute myelogenous leukemia	p67-PHOX	http://www.dbass.org.uk/DBASS5/viewsplicesite.aspx?id=366	1	183546733	GAG(g>a)taagga	183546738	183543757	-4	ü	2(4)	1(5)	single and double skip also reported, relative ratios not given	yes	540348	3	26	1		50(+983)
Familial pulmonary arterial hypertension	BMPR2	http://www.dbass.org.uk/DBASS5/viewsplicesite.aspx?id=419	2	203329703	AGg(c)aagtg	203329595, 203329643	203332241	-108, -60	üü	1,2(3)	3,2(3)	Top two of three ss reads. Paper reports -60 as the most active of the css.	nr	195062	395, 156	226	0		None
Fanconi anemia	FANCA	http://www.dbass.org.uk/DBASS5/viewsplicesite.aspx?id=295	16	89871687	tgc(g>a)ttcatg	89871657	89869750	30	ü	2(4)	1(4)		nr	189170	17	342	210		21(+182)
Fanconi anemia	FANCD2	http://www.dbass.org.uk/DBASS5/viewsplicesite.aspx?id=401	3	10115047	AAG(g>a)tattgg	10115074	10116213	27	ü	3(4)	1(4)	Snaptron has higher reads for other css and also for single and double skips	nr	178301	11	18	78		1040(+726), 99(+859),
Fraser syndrome	FREM2	http://www.dbass.org.uk/DBASS5/viewsplicesite.aspx?id=660	13	39433728	AAG(g>a)tcagtc	39433838	39435567	110	û	0(1)	na	Snaptron has very little variation for this intron	no	29628	0(2)	0	0		2(+598)
Frasier syndrome	WT1	http://www.dbass.org.uk/DBASS5/viewsplicesite.aspx?id=47	11	32413517	gtgc(g>a)taaac	32413526	32410726	-9	ü	1(2)	1(1)	Identified css is also known to be a strong alt ss	no	17902	13086	651	0		None
Gastric cancer	CDH1	http://www.dbass.org.uk/DBASS5/viewsplicesite.aspx?id=114	16	68842471	AGg(t>a )agaga	68842408	68842595	-63	ü	1(3)	3(3)		nr	638952	9	52	0		None
Gitelman syndrome	SLC12A3	http://www.dbass.org.uk/DBASS5/viewsplicesite.aspx?id=404	16	56919277	ACC(G>A)gtgagc	56919381	56920275	100	ü	1(6)	1(6)		no	13139	87	12	0		None
Glanzmann thrombasthenia	ITGA2B	http://www.dbass.org.uk/DBASS5/viewsplicesite.aspx?id=68	17	42457753	CTG(g>a)tgagga	42457761	42457670	-8	ü	1(3)	2(3)		no	137241	17	1	0		None
Globoid-cell leukodystrophy	GALC	http://www.dbass.org.uk/DBASS5/viewsplicesite.aspx?id=297	14	88459313	CGG(G>C)gtgagc	88459187	88454868	126	ü	8(14)	5(14)	Snaptron reports many potential css with higher reads, two of which are nearer to the 5'ss	no	90173	5	0	0	first intron	1538(+666), 1109(-539), 46(+381), 33(-15)
Glycogen storage disease, type II	GAA	http://www.dbass.org.uk/DBASS5/viewsplicesite.aspx?id=41	17	78092157	ATg(t>a)gagtcc	78092136	78092451	-21	ü	1(2)	1(2)		nr	858391	31	11	0		None
Glycogenosis, type VII	PFKM	http://www.dbass.org.uk/DBASS5/viewsplicesite.aspx?id=261	12	48533133	GCC(G>A)gtgagg	48533288	48533631	155	ü	1(5)	4(5)		nr	792637	9199	17	2		None
Hemochromatosis	SLC40A1	http://www.dbass.org.uk/DBASS5/viewsplicesite.aspx?id=591	2	190428309	ATC(G>A)gtaaga	190428722	190426918	-413	ü	2(8)	3(8) nearest high read		no	528190	22	1	0		39(+544)
Hemolytic anemia	PKLR	http://www.dbass.org.uk/DBASS5/viewsplicesite.aspx?id=189	1	155265227	GG(g >a)tgagca	155265176	155265094	51	û	0(0)	na	Snaptron has no variants for this splicing event. Authors report that the mutation mainly caused single exon skipping, then double exon skipping, then activation of the css.	yes	41619	0	0	0		na
Hemophilia A	F8	http://www.dbass.org.uk/DBASS5/viewsplicesite.aspx?id=750	X	154197605	ATGgt(a>c) ata	154197762, 154197740, 154197726	154194963	-157, -135, -121	ûûû	0,0,0(0)	na	Snaptron has no css candidates, but does have reads for a single exon skip, which wasn't tested	nr	10235	0	14	0		na
Hemophilia B	F9	http://www.dbass.org.uk/DBASS5/viewsplicesite.aspx?id=844	X	138619333	ACAgtga(g>a)t	138619229	138619520	-104	ü	1(2)	1(2)	The authors did not detect exon skipping, but did when they used ASO against the css.	no	67632	240	9	0		None
Hereditary 3-hydroxy-3-methylglutaryl coenzyme A lyase deficiency	HMGCL	http://www.dbass.org.uk/DBASS5/viewsplicesite.aspx?id=222	1	24130889	ACG(g>c )taagc	24134624	24129055	78	û	0(2)	na	Major effect of mutation is to cause exon skipping, primers used would not have seen the possible triple skip.	yes	417744	0(44)	633	0, 101 (triple)		44(+762), 2(+752)
Hereditary C3 deficiency	C3	http://www.dbass.org.uk/DBASS5/viewsplicesite.aspx?id=57	19	6702481	GG(g>a)taaggc	6702542	6702224	-61	ü	1(2)	2(2)		no	1660959	21	0	0		None
Hereditary fructose intolerance	ALDOB	http://www.dbass.org.uk/DBASS5/viewsplicesite.aspx?id=416	9	104192036	CAA(G>A)gtgaa	104192048	104190806	-12	ü	1(6)	1(6)		no	1322968	60	2	6		None
Hereditary haemorragic telangiectasia	ENG	http://www.dbass.org.uk/DBASS5/viewsplicesite.aspx?id=103	9	130586582	Ggt(aag gga)actcct	130586606	130582317	-24	ü	1(4)	3(4)		no	981641	1688	275	15		None
Hereditary multiple exostoses	EXT2	http://www.dbass.org.uk/DBASS5/viewsplicesite.aspx?id=759	11	44135852	AGG(g>a)taag/g	44135857	44146338	5	ü	1(3)	1(3)		no	332247	619	338	0		None
Hereditary nonpolyposis colorectal cancer	MLH1	http://www.dbass.org.uk/DBASS5/viewsplicesite.aspx?id=687	3	37035155	CTGgtac (g>c)g	37035382	37038109	227	ü	1(12)	6(12)	Snaptron shows that the reported css is an ass whose use is presumably enhanced by the mutation.	no	309747	60503	0	0	first intron	None
Hereditary periodic fever syndromes	NALP12	http://www.dbass.org.uk/DBASS5/viewsplicesite.aspx?id=589	19	54312840	Tgt[t]aagtat	54313010	54310920	-170	ü	1(3)	1(3)	Snaptron favours an exon skip, which wasn't detected.	no	15238	11	207	0		None
Hereditary pyropoikilocytosis	SPTA1	http://www.dbass.org.uk/DBASS5/viewsplicesite.aspx?id=191	1	158623063	taa(g>a)ttctgg	158623027, 158622802	158623216	36, 261	ûü	0,1(3)	0,2(3)	Snaptron has reads for just the dominant css	no	47795	0, 16	0	0		None
Hereditary spastic paraplegia 11	SPG11	http://www.dbass.org.uk/DBASS5/viewsplicesite.aspx?id=783	15	44876011	GC A(g>a)taagt	44876181	44867240	-170	ü	1(9)	3(9)		nr	179579	1922	13	0, 113(triple)		None
Hereditary X-linked thrombocytopenia	WASP	http://www.dbass.org.uk/DBASS5/viewsplicesite.aspx?id=215	X	48544524	GAGgtg c(g>a)t	48544562	48545169	38	ü	1(7)	2(7)		no	498268	3718	5	5		None
Hunter syndrome	IDS	http://www.dbass.org.uk/DBASS5/viewsplicesite.aspx?id=738	X	148577876	C A(G>A)gtatca	148577904	148571972	-28	ü	2(7)	2(7)		nr	1025189	44	84	119		617(+861)
Hutchinson-Gilford progeria	LMNA	http://www.dbass.org.uk/DBASS5/viewsplicesite.aspx?id=359	1	156108549	CAG(g>a)tgagtt	156108399	156108870	-150	ü	1(8)	4(8)	Gtex database used here as SRAv1 has a surprisingly large number of reads for the css.	no	2899825	4880	197	26		None
Hypomyelination and congenital cataract	DRCTNNB1A	http://www.dbass.org.uk/DBASS5/viewsplicesite.aspx?id=281	7	23016959	GAA(g>t)taagtg	23016939	23016428	20	ü	1(1)	1(1)		no	248937	35	6	2		None
Hypoxanthine phosphoribosyltransferase deficiency	HPRT1	http://www.dbass.org.uk/DBASS5/viewsplicesite.aspx?id=225	X	133624236	GAA(g)taag tt	133624303	133627537	66	ü	1(4)	3(4)	a lot of alternative splicing of exons 2 to 4 for this gene	no	97131	148	42	91		None
Intrahepatic cholestasis of pregnancy	ABCB4(MDR3)	http://www.dbass.org.uk/DBASS5/viewsplicesite.aspx?id=106	7	87035603	taa(g>a)ttaaa	87035657	87032598	-54	ü	1(2)	2(2)		nr	89532	177	67	0		None
Infantile encephaloneuromyopathy	RMND1	http://www.dbass.org.uk/DBASS5/viewsplicesite.aspx?id=833	6	151766442	GAG(g>a )taaag	151766517, 151766354	151757690	-75, 88	ûû	0,0(3)	na	Exon skipping not tested	nr	242961	0(3)	18392	0		3(+834), 1(+739), 1(-13)
Isolated growth hormone deficiency	GHRHR	http://www.dbass.org.uk/DBASS5/viewsplicesite.aspx?id=651	7	31003741	CCg(t>g)gagtag	31004169	31008448	427	ü	1(3)	2(3)		no	5975	6	0	0	first intron	None
Kleefstra syndrome	EHMT1	http://www.dbass.org.uk/DBASS5/viewsplicesite.aspx?id=825	9	140695437	AAC(g>a)taa/g t	140695441	140705912	4	û	0(0)	na		yes	343830	0	56	10		na
Leber congenital amaurosis	LCA5	http://www.dbass.org.uk/DBASS5/viewsplicesite.aspx?id=653	6	80202267	AAT(G>A)gtatgg	80202262	80201448	5	ü	1(2)	1(2)		no	38800	63	14	0		None
Lenz microphthalmia syndrome	NAA10	http://www.dbass.org.uk/DBASS5/viewsplicesite.aspx?id=798	X	153196215	GAGg(t>a)aagc	153196188	153195677	27	û	0(3)	na	Snaptron has no reads for the identified css, instead has 94 reads for a bss at +4 and 9 reads for the single exon skip. Authors used primers that would have seen an exon skip (if it occurred, had to do a second RT-PCR with internal primers to generate bands. Main two RT-PCR bands were the css and intron retention. Other fainter bands were seen but were not clonable	no	1918172	0(93)	9	1		93(+4)
Leprechaunism (Heritable insulin resistence)	INSR	http://www.dbass.org.uk/DBASS5/viewsplicesite.aspx?id=65	19	7141687	GAG(g>a)taaggc	7141714	7132329	-27	ü	1(8)	1(8)		no	11501620	75286	0	0	first intron	None
Leukodystrophy	PLP1	http://www.dbass.org.uk/DBASS5/viewsplicesite.aspx?id=234	X	103042896	ATG(g>a)tgagtt	103042906	103043365	10	ü	1(10)	2(10)	Authors also detected strong single exon skipping, but not double exon skipping.	yes	2573993	1600	228	170		None
Li-Fraumeni-like syndrome	TP53	http://www.dbass.org.uk/DBASS5/viewsplicesite.aspx?id=4	17	7579311	CAC(G>A)gtcagt	7579511, 7578920	7578555	-200, 391	üü	1,4 (7)	5,6(7)	-200 has the highest reads. Authors didn't give the relative use of the two css and also did not report single exon skipping. RT-PCR primers used would not have detected the possible triple exon skip indicated by snaptron.	no	673591	147, 98	106	1, 537(triple)		None
Limb girdle muscular dystrophy	LGMDB2 (DYSF)	http://www.dbass.org.uk/DBASS5/viewsplicesite.aspx?id=12	2	71891569	T GTgtac(g>a )tgg	71891569, 71891685,71891767	71892291	-79, 114, 198	üûü	2,1(5)	3,5(5)	css -79 and 198 have highest reads out of 5 css predicted by snaptron. Css 114 was not identified by snaptron and was also by far the weakest css detected by experiment.	no	132762	2159	5	0		None
Limb girdle muscular dystrophy	CAV3	http://www.dbass.org.uk/DBASS5/viewsplicesite.aspx?id=12	3	8775677	AAGg(t>c) aggc	8775635, 8775718	878211	-42, 41	ûû	0(0)	na	Snaptron has reads for sites within the 11 kb intron but has no reads for sites within 1000 bp of the 5'ss	no	43399	0	0	0	single intron	na
Limb-girdle muscular dystrophy	LMNA	http://www.dbass.org.uk/DBASS5/viewsplicesite.aspx?id=830	1	156107024	GAA(g>t)ta agt	156106995	156107444	-29	ü	4(27)	3(27)		no	11681168	76	122	26		286(-172), 178(+143)
Lipoid proteinosis	ECM1	http://www.dbass.org.uk/DBASS5/viewsplicesite.aspx?id=95	1	150480756	GAG(g>c)tgagtt	150480671	150482006	-85	ü	1(10)	3(10)		no	274572	17	0	0	first intron	None
Lipoprotein A deficiency	LPA	http://www.dbass.org.uk/DBASS5/viewsplicesite.aspx?id=45	6	161006077	TGC(g>a)tatgtc	161006141	160999737	-64	ü	1(2)	1(2)		nr	5280	24	0	1		None
Lipoprotein lipase deficiency	LPL	http://www.dbass.org.uk/DBASS5/viewsplicesite.aspx?id=10	8	19818595	AAg(t>c)aattaa	19818461	19819625	-134	ü	1(2)	2(2)		no	342019	4	1	0		None
Long QT syndrome	HERG (KCNH2)	http://www.dbass.org.uk/DBASS5/viewsplicesite.aspx?id=655	7	150647255	TGG(g>c)ta tgg	150647201	150646138	54	ü	2(10)	2(10)	Authors looked for single exon skipping but possibly not a double exon skip, which snaptron indicates.	no	118649	203	149	1373		315(-153)
Lung cancer cell line	MUTYH	http://www.dbass.org.uk/DBASS5/viewsplicesite.aspx?id=170	1	45805570	tag(g/c)gggtag	45805333	45800184	237	ü	1(12)	6(12)	Mutation is reported to enhance the css and alternative splicing	no	33755	3792	0	0		None
Marfan syndrome	FBN1	http://www.dbass.org.uk/DBASS5/viewsplicesite.aspx?id=249	15	48738902	TAG(g>a)tgcgt	48738869	48737702	33	ü	2(4)	3(4)		nr	632641	12	27	16		13(+989)
Marinesco-Sjogren Syndrome	SIL1	http://www.dbass.org.uk/DBASS5/viewsplicesite.aspx?id=104	5	138362489	AGg(t>c)actgta	138362579	138356982	-90	ü	1(2)	1(2)	Main effect of this mutation is to cause single exon skipping	yes	511352	20	18677	229		None
Maturity-onset diabetes of the young	GCK	http://www.dbass.org.uk/DBASS5/viewsplicesite.aspx?id=56	7	44190554	AA Gg(tgggccg ggtggagg)g	44190578	44189664	-24	ü	1(2)	2(2)	Interestingly and unusually, the paper reports that the mutation causes the skipping of the downstream exon	no	11288	43	8	0		None
McArdle disease (Myophosphorylase deficiency)	PYGM	http://www.dbass.org.uk/DBASS5/viewsplicesite.aspx?id=96	11	64519395	ACC(g>a)tgagtg	64519462	64519128	-67	ü	1(3)	2(3)		no	1000539	15	0	0		None
Melanoma	B2M	http://www.dbass.org.uk/DBASS5/viewsplicesite.aspx?id=402	15	45003812	AGCg(t >a)gagt	45003839, 45004219	45007620	27, 407	ûü	0,1(16)	13(16)		no	49700283	0, 19180	0	0	first intron	None
Melanoma	CDKN2A	http://www.dbass.org.uk/DBASS5/viewsplicesite.aspx?id=119	9	21970900	CAG(g >t)tgag	21970974	21968242	-74	ü	1(5)	3(5)	Authors did not mention exon skipping, but shoud have been detected the single exon skip with 144 reads (but not the alternative) with the primers that were used.	no	894657	106	144, 254(alternative single skip)	0		None
Menkes disease	ATP7A	http://www.dbass.org.uk/DBASS5/viewsplicesite.aspx?id=208	X	77258734	GTT(g>a)taa/gt	77258738	77264598	4, 50	üü	1, 3(3)	2,3(3)	Authors also report single (major event) and double skips	yes	74503	24	340	84		None
Methylenetetrahydrofolate reductase deficiency	MTHFR	http://www.dbass.org.uk/DBASS5/viewsplicesite.aspx?id=102	1	11856262	CAG(g>a)tgaggg	11856319	11855406	-57	ü	2(3)	1(3)		nr	150169	3	4	1		18(+728)
Methylmalonic acidemia	MUT	http://www.dbass.org.uk/DBASS5/viewsplicesite.aspx?id=393	6	49409552	GA(G>A)/gta ata	49409614, 49409545	49408067	-62, 7	üü	2,3(9)	4,1(9)		no	347431	440, 52	10	0		678(+415)
Mitochondrial complex I deficiency	NDUFA11	http://www.dbass.org.uk/DBASS5/viewsplicesite.aspx?id=594	19	5903622	tga(g>a)cgccgg	5903700	5897009	-78	ü	3(18)	13(18)	Snaptron strongly supports a css at -4 but this would be inactivated by the mutation.	no	3211981	25	0	0	first intron	1167(-4) inactivated by the mutation, 62(+101)
Mucopolysaccharidosis type 1	IDUA	http://www.dbass.org.uk/DBASS5/viewsplicesite.aspx?id=802	4	997414	CAAgt( g>c)c/gt	997418	997799	4	ü	1(9)	2(9)		no	187962	17011	304	1		None
Mucopolysaccharidosis, type II	IDS	http://www.dbass.org.uk/DBASS5/viewsplicesite.aspx?id=364	X	148584867	CAT(Gg>Tt)taagca	148584867, 148584863, 148584807	148582569	-26, -22, 34	üüü	2,1,4 (13)	1,2,3(13)	proportions of mutant transcripts not clear	yes	730322	427, 776, 159	19218	681		None
Multiple osteochondromas	EXT1	http://www.dbass.org.uk/DBASS5/viewsplicesite.aspx?id=621	8	118819455	T(TGACAGGA GCTGCTATTT ACCACAAgtg aggaatct)g	11819524	118817133	-69	û	0 (4)	na	No reads for this css. Snaptron favours skipping (5 reads) but this wasn't detected. The 4 low level ss detected within 1000 bases of the 5'ss mutation each had a read of 1. The cross is in brackets because snaptron also has a single read for splicing between the 5'css and an intronic 3'ss at 11818630. This event is missed by the approach used here.	no	602799	1	5	2		1(-17), 1(-27), 1(-51), 1(-111)
Multiple sulfatase deficiency	SUMF1	http://www.dbass.org.uk/DBASS5/viewsplicesite.aspx?id=676	3	4452548	CCAgtga(g >t)t	4452459	4418074	89	û	0(1)	na	Snaptron predicts a single exon skip (16 reads) and also has 198 reads for a 4 exon skip. Paper reports that there was no available RNA sample from the patient to analyse, so used a minigene assay of part of the 34 kb intron that is mutated and flanking exons. Results confirmed that the splice site was defective and identified the listed css at +89. However, the experiment wasn't designed to dete…	nr	297187	9	16	0, 198(four exon skip)		1(-154)
Muscle-eye-brain disease	POMGnT1	http://www.dbass.org.uk/DBASS5/viewsplicesite.aspx?id=677	1	46659945	tga(g>t)tggggc	46659920	46659598	25	ü	1(8)	3(8)	Snaptron has 614 reads for a 3 exon skip (not tested)	nr	628297	274	27	53, 614(triple)		None
Muscular dystrophy	POMT2	http://www.dbass.org.uk/DBASS5/viewsplicesite.aspx?id=690	14	77786776	tga(g>c)tgatgg	77786704	77778377	72	ü	1(6)	1(6)		no	82107	83	0	0	first intron	None
Muscular dystrophy	SGCB	http://www.dbass.org.uk/DBASS5/viewsplicesite.aspx?id=400	4	52899596	ATA gt(gagt)at	52899586	52896030	6	ü	2(3)	1(3)	Snaptron would also predict enhancement of exon skipping	nr	281615	9	23943	0		25(-51)
Muscular dystrophy	LMNA	http://www.dbass.org.uk/DBASS5/viewsplicesite.aspx?id=299	1	156100565	AA(G>A) gtgagg	156100610	156104193	45	ü	1(5)	4(5)	Snaptron also indicates single exon skipping	nr	5072033	966	4684	0		None
Neurofibromatosis, type I	NF1	http://www.dbass.org.uk/DBASS5/viewsplicesite.aspx?id=369	17	29483145	ATG(g>t) tgagt	29483040	29486027	-105	ü	1(2)	1(2)		no	101458	2	3	0		None
Neurofibromatosis type 2	NF2	http://www.dbass.org.uk/DBASS5/viewsplicesite.aspx?id=803	22	30054254	CGGgt gt(g>c)t	30054226, 30054231	30057193	-28, -23	üü	1,2(7)	4,3(7)		no	274779	124, 110	56	2		None
Neuronal ceroid lipofuscinosis	CLN6	http://www.dbass.org.uk/DBASS5/viewsplicesite.aspx?id=277	15	68503600	TGA(g>t )tgatgg	68503893, 68503986	68502098	-386, -293	üü	5,4(8)	3,2 (8)	Single exon skipping more frequent than css activation. Snaptron has reads for the css and for single exon skipping. However, a downstream bss 68502907 (1721 reads), not seen experimentally so presumably a false positive. Also has 561 and 444 reads for upstream 3 and 4 exon skips. Primers used would only have seen a single exon skip.	yes	457920	5, 9	6	35,561(triple),444(four exon skip)		1721(+693), 16(-3), 13(+880)
Nevoid basal cell carcinoma syndrome	PTCH1	http://www.dbass.org.uk/DBASS5/viewsplicesite.aspx?id=666	9	98247966	ACA(G>A)gtaagg	98247929	98244486	37	ü	1(2)	2(2)		nr	79488	91	48	5		None
Osteogenesis imperfecta	COL1A1	http://www.dbass.org.uk/DBASS5/viewsplicesite.aspx?id=251	17	48275309	TCAgtaa(g>a )c	48275425	48275147	-116	ü	1(20)	6(20)	RT-PCR primers would see a single but not double exon skip.	no	6091841	101	84	98		None
Osteogenesis imperfecta	COL1A2	http://www.dbass.org.uk/DBASS5/viewsplicesite.aspx?id=109	7	94052431	GCTgtaa(g> a)t	94052365	94053647	-66	ü	1(14)	8(14)		nr	4345959	125	77	8		None
Osteopetrosis	PLEKHM1	http://www.dbass.org.uk/DBASS5/viewsplicesite.aspx?id=399	17	43555265	CAA(g>a)tgagat	43555170, 43555003	43553093	95, 262	üü	2,1(11)	1,5(11)	2nd and 1st highest reads out of 11 possible css. Exon skipping not tested.	nr	153096	2229, 7001	3584	1047		None
Osteoporosis-pseudoglioma syndrome	LRP5	http://www.dbass.org.uk/DBASS5/viewsplicesite.aspx?id=704	11	68157521	GAG(g>a)tgaggc	68157584	68170950	63	ü	1(3)	2(3)	Authors clearly did not detect an exon skip, contradicts snaptron single exon skip reads	no	387860	2855	2928	35		None
Otospondylomegaepiphyseal dysplasia	COL11A2	http://www.dbass.org.uk/DBASS5/viewsplicesite.aspx?id=117	6	33136482	CCT gtga(g>a)t	33136499	33136350	-17	ü	1(3)	2(3)		no	31504	131	5	9		None
Pheochromocytoma	SDHB	http://www.dbass.org.uk/DBASS5/viewsplicesite.aspx?id=619	1	17355094	CCC(g>a)tgagtt	17355148	17354361	-54	ü	1(10)	5(10)		no	2386489	9293	7	8		None
Phosphoglycerate kinase deficiency	PGK1	http://www.dbass.org.uk/DBASS5/viewsplicesite.aspx?id=260	X	77369658	AAG(g>t)taggac	77369688	77372808	30	ü	1(3)	1(3)		nr	4972605	11	3	32		None
Placental aromatase deficiency	CYP19A1	http://www.dbass.org.uk/DBASS5/viewsplicesite.aspx?id=252	15	51510737	TGTg(t>c )aagt	51510650	51508015	87	û	0(5)	na	Snaptron doesn't have reads for the css that was identified by experiment but has others as well as reads for a single and double exon skip (not tested).	nr	29808	45	115	99		45(-15), 14(-140), 12(+416)
Plasmin inhibitor deficiency	SERPINF2	http://www.dbass.org.uk/DBASS5/viewsplicesite.aspx?id=177	17	1648353	GTG(g>a)tgaggc	1648375	1648468	22	ü	1(6)	2(6)		nr	210788	4607	60	0		None
Polycystic kidney disease	PKD2	http://www.dbass.org.uk/DBASS5/viewsplicesite.aspx?id=702	4	88977420	taa(g>a)tatata	88977416, 88977496, 88977538	(88983057), 88979134	-4,76, 118	üüü	1,2,0(2), 1,0,2(2)	1,2(2)	Css (-4 ) far more reads than css (118), fits with the experimental data. Css (76) detected at a low level with an alternative 3'ss (88983057) in snaptron.	no	222097	616, 0, 2	0	0		None
Primary ciliary dyskinesia	RPGR	http://www.dbass.org.uk/DBASS5/viewsplicesite.aspx?id=72	X	38176568	631_IVS6+9del	38176659	38170027	-92	ü	1(1)	1(1)		no	58427	221	0	1		None
Primary ciliary dyskinesia	CDH1	http://www.dbass.org.uk/DBASS5/viewsplicesite.aspx?id=179	16	68847399	A AGg(tttgta tggt)a	68847466	68849417	57	û	0(3)	na	No reads for css 57 but the paper reports this as a minor transcript compared to exon skipping, which snaptron supports.	yes	660364	0(6)	169	0		61(+9) inactivted by the mutation, 6(-6), 1(-20)
Progressive pseudorheumatoid dysplasia	WISP3	http://www.dbass.org.uk/DBASS5/viewsplicesite.aspx?id=232	6	112386201	CCA(G>C)gtgctc	112386228	112389407	27	ü	3(5)	1(5)	Snaptron has higher reads (73) for an upstream css. Primer details for the RT-PCR not readily available.	nr	2934	6	6	17		73(-238), 8(+53)
Propionic acidemia	PCCB	http://www.dbass.org.uk/DBASS5/viewsplicesite.aspx?id=212	3	135969401	GAg(t>c)gagtcc	135969421	135974697	20	ü	1(17)	3(17)		no	541663	3525	0	0	first intron	None
Protein S deficiency	PROS1	http://www.dbass.org.uk/DBASS5/viewsplicesite.aspx?id=241	3	93629462	ATG(g> a)taagc	93629414	93629462	48	ü	1(2)	1(2)	Exon skipping marginally stronger than css activation	yes	179408	16	101	0		None
Pyruvate dehydrogenase deficiency	PDHX	http://www.dbass.org.uk/DBASS5/viewsplicesite.aspx?id=26	11	34938363	GGG(g>a) tgagt	34938278	34952950	-85	ü	14(23)	6(23), but has marginally more reads that the nearest 5.	Although snaptron has reads for this css, it is not a good match because there are many other potential css with higher reads.	no	313319	4	0	0	first intron	None
Retinitis pigmentosa	RPGR	http://www.dbass.org.uk/DBASS5/viewsplicesite.aspx?id=600	X	38158202	AGGgt(a >g)caa	38158228	38156706	-20	ü	1(3)	1(3)	Snaptron supports the css but also support exon skipping, which didn't appear to have been tested.	nr	58240	142	940	0		None
Rh-deficiency syndrome	RHCE	http://www.dbass.org.uk/DBASS5/viewsplicesite.aspx?id=390	1	25718484	TGG(g >t)taagga	25718473, 25718468	25717407	11,16	üü	2,1(2)	1,2(2)	Paper also reports an exon skip, but not clear how frequent this is	yes	27947	67,41	5	1		None
Sandhoff disease	HEXB	http://www.dbass.org.uk/DBASS5/viewsplicesite.aspx?id=658	5	74016573	CGAg(t>g )aag	74016621	74016942	48	ü	2(7)	4(7)	Snaptron has 4863 reads for a ss at -5 (74016568)	nr	1810351	83	238	9		4863(-5)
Sanfilippo syndrome	HGSNAT/TMEM76	http://www.dbass.org.uk/DBASS5/viewsplicesite.aspx?id=698	8	43028887	tga(g>a)ttgccg	43028976	43033216	89	ü	1(8)	2(8)	Snaptron also predicts exon skipping	nr	211641	249	8695	9		None
Schwartz-Jampel syndrome	HSPG2	http://www.dbass.org.uk/DBASS5/viewsplicesite.aspx?id=112	1	22168031	(A)CGgtgag g	22168100	22167779	-69	ü	1(7)	4(7)	equal ratio of skip and css transcripts	yes	700931	4186	3639	9		None
Sclerosteosis	SOST	http://www.dbass.org.uk/DBASS5/viewsplicesite.aspx?id=214	17	41835889	Ggt(a>t)tggggt	41835675	41833132	214	ü	1(3)	2(3)		no	3378	39	0	0	single intron	None
Severe congenital neutropenia	ELA2 (ELANE)	http://www.dbass.org.uk/DBASS5/viewsplicesite.aspx?id=353	19	855795	T TCgt(a>t)cgt	855765	855957	-30	ü	1(10)	5(10)		no	1013551	21154	86	3		None
Shwachman-Diamond syndrome	SBDS	http://www.dbass.org.uk/DBASS5/viewsplicesite.aspx?id=71	7	66459198	CAGg (t>c)gggt	66459206	66458405	-8	ü	1(6)	2(6)	Snaptron supports the css but also supports an exon skip	nr	1668866	2714	18129	0		None
Splice-site mutation in the human growth hormone-variant gene	GH2	http://www.dbass.org.uk/DBASS5/viewsplicesite.aspx?id=283	17	61958718	TTT(g>a)taagc	61958706	61958509	12	ü	1(1)	1(1)		nr	10874	30	3	0		None
Squamous cell oral carcinoma	TP53	http://www.dbass.org.uk/DBASS5/viewsplicesite.aspx?id=271	17	7578176	GA(G>A)gtctg/g	7578171	7577609	5	ü	1(3)	1(3)	Snaptron supports the css but also supports an exon skip	nr	695298	85	650	4		None
Stickler syndrome, type I	COL2A1	http://www.dbass.org.uk/DBASS5/viewsplicesite.aspx?id=67	12	48378777	AAC (g>a)taagt	48378785	48378383	-8	û	0(1)	na	Snaptron of little help in this case, largely because there is very little background splicing	nr	108079	1	0	0		1(-51)
Succinyl-CoA 3-ketoacid CoA transferase deficiency	OXCT1	http://www.dbass.org.uk/DBASS5/viewsplicesite.aspx?id=604	5	41870382	A AG(gtaaag) t	41870389	41862853	-7	ü	3(4)	1(4)		no	367830	2	0	0	first intron	50(-636), 45(-409)
Syndrome of apparent mineralocorticoid excess	HSD11B2	http://www.dbass.org.uk/DBASS5/viewsplicesite.aspx?id=358	16	67470046	CGG(g>a)tgagtg	67469952	67470151	-94	ü	1(1)	1(1)		no	86628	88	0	0		None
Tailless keratin	KRT31	http://www.dbass.org.uk/DBASS5/viewsplicesite.aspx?id=682	17	39551099	CAA(g>a)tgagta	39551058	39550422	41	ü	1(6)	4(6)		no	38987	1514	0	0		None
Tay-Sachs disease	HEXA	http://www.dbass.org.uk/DBASS5/viewsplicesite.aspx?id=218	15	72640388	GA C(g>a)tgag g	72640371	72640100	17	ü	1(8)	1(8)		no	10511779	1785	8	0		None
Thrombotic thrombocytopenic purpura	ADAMTS13	http://www.dbass.org.uk/DBASS5/viewsplicesite.aspx?id=290	9	136303018	A GGgtag(g>a )c	136303087	136303365	69	ü	1(4)	3(4)		nr	30943	8	2	0		None
TNF-receptor associated periodic syndrome (TRAPS)	TNFRSF1A	http://www.dbass.org.uk/DBASS5/viewsplicesite.aspx?id=657	12	6442532	CCT(g>a)tgagcg	6442487	6442314	45	ü	3(18)	7(18)	A snaptron ss at 6442526 has 1656 reads. Possible false positive.	nr	1136019	85	1	9		1656(-6), 172(-92),
Transcobalamin deficiency	TCN2	http://www.dbass.org.uk/DBASS5/viewsplicesite.aspx?id=121	22	31009030	TGg(t>g)gagcag	31008949	31010335	-81	ü	1(3)	1(3)		nr	168883	5862	586	56		None
Tuberous sclerosis	TSC2	http://www.dbass.org.uk/DBASS5/viewsplicesite.aspx?id=598	16	2136873	AAGg[a]tga gt	2136844	2137863	-29	ü	4(11)	4(11)		no	733656	30	5	0		274(+224)
Tyrosinemia, type I	FAH	http://www.dbass.org.uk/DBASS5/viewsplicesite.aspx?id=292	16	80450513	CA (G>T)gtagga	80450607	80452097	94	ü	1(2)	2(2)		nr	449839	11	18	0		None
Unverricht-Lundborg disease	CSTB	http://www.dbass.org.uk/DBASS5/viewsplicesite.aspx?id=741	21	45196084	CA(G>A) gtgggt	45195720	45194641	364	ü	1(17)	8(17)		no	4006719	5110	0	0	first intron	None
Usher syndrome	USH2A	http://www.dbass.org.uk/DBASS5/viewsplicesite.aspx?id=625	1	216424244	tac(g>a)tgtaac	216424274	216420569	-30	ü	1(1)	1(1)	Similar ratio of css and exon skipping	yes	706	2	3	0		None
Usher syndrome, type ID	CDH23	http://www.dbass.org.uk/DBASS5/viewsplicesite.aspx?id=211	10	73499530	CCA(G>C)gtgggg	73499633	73500578	103	ü	3(4)	1(4)		nr	10781	11	1	0		100(+755), 45(+931)
Von Hippel-Lindau disease	VHL	http://www.dbass.org.uk/DBASS5/viewsplicesite.aspx?id=77	3	10188321	GCC(A)Ggtact	10188361	10191470	40	ü	1(2)	2(2)	Snaptron indicates single and double exon skipping	nr	513505	20	7470	35394		None
Wagner syndrome	VCAN (CSPG2)	http://www.dbass.org.uk/DBASS5/viewsplicesite.aspx?id=63	5	82838088	CAG(g>a)ta agat	82838067	82841355	-21	ü	1 (3)	1(3)	joint 1st (3). Major effect of mutation is single exon skipping, double skip may not have been tested.	yes	683800	1	17612	6275		None
Wilson disease	ATP7B	http://www.dbass.org.uk/DBASS5/viewsplicesite.aspx?id=699	13	52585422	gtg(a>t)gtttt	52585053	52549305	369	ü	2(5)	4(5)		no	24810	70	0	0	first intron	101(-733)
Wolfram syndrome	WFS1	http://www.dbass.org.uk/DBASS5/viewsplicesite.aspx?id=195	4	6296917	AAG(g>a)tgagtg	6297003	6302383	86	ü	4(6)	2(6)	Snaptron ss with higher reads are further away from the mutated 5'ss.	no	356296	15	3	1		276(+586), 25(+517)
Xeroderma pigmentosum	XPA	http://www.dbass.org.uk/DBASS5/viewsplicesite.aspx?id=34	9	100459402	AGg(t>g)ttgggc	100459505, 100459499	100456042	-103, -97	üü	1,2 (7)	3,2(7)		no	177151	7525	0	0	first intron	None
X-linked adrenal hypoplasia	NR0B1 (DAX1)	http://www.dbass.org.uk/DBASS5/viewsplicesite.aspx?id=615	X	30326312	CGG(g>c)taaggg	30327336, 30327211, 30327176	30322941	-1024, -899, -864	üüü	1,3,2(8)	8,6,5 (8)	Top three reads for 8 possible css	no	29614	133, 26, 36	0	0	single intron	None
X-linked adrenoleukodystrophy	ABCD1	http://www.dbass.org.uk/DBASS5/viewsplicesite.aspx?id=734	X	153006174	GAGg(t> g)agga	153006277	153008440	103	ü	1(4)	1(4)		no	199566	23	0	0	first intron	None
X-linked agammaglobulinemia	BTK	http://www.dbass.org.uk/DBASS5/viewsplicesite.aspx?id=219	X	100609617	CAG(g>c)tgagt	100609557	100608977	60	ü	1(4)	2(4)	Snaptron favours exon skipping.	nr	337619	43	1738	482		None
X-linked hydrocephalus	L1CAM	http://www.dbass.org.uk/DBASS5/viewsplicesite.aspx?id=120	X	153137606	tgc(g>a)aggcgc	153137686	153136635	-80	ü	1(11)	5(11)		nr	216693	124	14	60		None
X-linked hyperimmunoglobulinemia	CD40LG	http://www.dbass.org.uk/DBASS5/viewsplicesite.aspx?id=429	X	135732557	A AGg(t>a)aa gc	135732576	135736531	19	û	0(0)	na		yes	43237	0	0	0		na
X-linked mental retardation	CUL4B	http://www.dbass.org.uk/DBASS5/viewsplicesite.aspx?id=115	X	119666276	AAC(G>A)gtattt	119666356, 119666341	119664110	-80, -65	üü	1,2(2)	2,1(2)	Snaptron supports the cryptics but also strongly supports exon skipping, which wasn't detected	no	618807	12,2	413	65		None
X-linked mental retardation	ZDHHC9	http://www.dbass.org.uk/DBASS5/viewsplicesite.aspx?id=360	X	128975754	tga(g>c)tttcgg	128975894	128963118	-140	ü	1(15)	5(15)	Snaptron also has strong reads for a double exon skip, not tested.	nr	389792	5375	41	3341		None
X-linked mental retardation, nonsyndromic	DLG3	http://www.dbass.org.uk/DBASS5/viewsplicesite.aspx?id=671	X	69670634	tac(g>a)tactc	69670608	69671716	-26	ü	1(5)	1(5)		no	17368	17	0	0		None
X-linked mental retardation, nonsyndromic	FTSJ1	http://www.dbass.org.uk/DBASS5/viewsplicesite.aspx?id=670	X	48336557	AAG(g )tccct	48336568	48336836	10	ü	1(11)	1(11)		nr	569079	366	244	0		None
X-linked retinitis pigmentosa	RPGR	http://www.dbass.org.uk/DBASS5/viewsplicesite.aspx?id=88	X	38178081	CTG(g>t)tgagac	38178157	38176719	-76	ü	1(1)	1(1)		nr	79423	98	1	24		None
201 ticks, 36 crosses (column J)	150 ticks are 1st rank, 178 are top 3 rank (column K)
All examples that have crosses are discussed below. Yellow highlights indicate examples where the snaptron data is a poor match to the experimental data. 18 Matches to css in SRAv2 are seen for FGA, COLQ, EPB41, LAMB3, APOB, PKLR, FB, RMND1, EMHT1, CAV3, B2M, EXT1, SUMF1, CYP19A1, CDH1 and COL2A1(see below).
Line 7 - FGA, two ticks, one cross, 4,0,3(5). One of the three css did not match any background ss, most probably because of low reads. As proof of this all 3 sites have reads in SRAv2, these sites have a ranking of 4,5,3(9) ie of 9 candidates they have the fourth fifth and third highest reads.
Line 20 - ARH, one tick, one cross, 2,0(4). Similar result using SRAv2. Unmatched css is minor, so probably needs more reads for detection.
Line 32 - EDARADD, two crosses. 0,0(3). Similar result with SRAv2. Snaptron has most reads for a single exon skip. Authors used a minigene analysis of a single exon that may not have best tested for exon skipping. Snaptron data not a good match to the experimental resulsts
Line 36 - COLQ, one tick, one cross, 2,0(9). Activation of both css minor compared to exon skipping. In large agreement with snaptron. Minor css has reads in SRAv2, 4,7(11).
Line 37, TG, one cross, 0(3). Paper reports equal use of the css and exon skipping. Snaptron has reads for the exon skip but not the css. Similar result with SRAv2. Snaptron data not a good match to the css result.
Line 46 - LAMP2, one cross, 0(4).. Css is non-canonical and would have been filtered from snaptron.
Line 55 - PKP1, one cross. 0(1) indicates that there is only one 5'ss variant involving the 3'ss and that this does not match the css. However, the 5' css is detected in snaptron and has 19 reads to a 3'ss within the intron at position 201293006. 19 reads is the third highest read out of 69 low level 5'ss splicing events that initiate within the two 3'ss that flank the mutated 5'ss.
Line 57 - COL5A1, one cross 0(8). Similar result for SRAv2. Snaptron data not a good match
Line 58 - HPRT2, one cross 0(1). Snaptron favours exon skipping, which is in accord with the author's results. The css identified by snaptron is at 193094345, which would be inactivated by the 5'ss. Mismatch probably due to little variation, but still not present in SRAv2.
Line 59 - EPB41, one cross 0(3). Paper also detected exon skipping which is strongly indicated by snaptron. Snaptron data not a good match to the css. The css does have reads in SRAv2 4(8) but has relatively low reads compared to other bss.
Line 64 - KRT14, one cross - 0(9) Css not detected, it is non-canonical and would have been filtered out.
Line 65- LAMB3, one tick, one cross, 4,0(5). Paper reports exon skipping and the activation of two css. Snaptron has reads for all of these except the minor css, so in large agreement. The minor css has reads in SRAv2, 2,4(9).
Line 71 - F7, one cross. 0(5). Similar result for SRAv2. Snaptron and css data not a good match
Line 74 -APOB, one cross 0(1). Snaptron and css data not a good match. Although SRAv2 has one read for this css +40 it has 157 reads for a bss at -8, which presumably is a false positive.
Line 82 - FREM2, one cross 0(1) - little variation. SRAv2 has two candidate css but neither match the experimental css, so not a good match
Line 91 - PKLR, one cross 0(0) - no variation. SRAv2 has four variants but of only one read each. These include exon skipping and css+51, so in agreement with the paper.
Line 92 - F8, three crosses 0(0) - no bss in snaptron with which to compare. SRAv2 has reads for one of the three css, 0,1,0(2). Overall, snaptron favours a single exon skip over css activation, this wasn't tested.
Line 94 - HMGCL, one cross. 0(2). Major effect of mutation is to cause exon skipping, which agrees with snaptron. Also no reads for the css in SRAv2
Line 101 - SPTA1, one tick, one cross. 0,1(3) Snaptron has reads for just the dominant css. Similar result with SRAv2
Line 109 - RMND1, two crosses 0,0(3). These css are matched in SRAv2 2,3(5). However, snaptron has far more reads for the single exon skip, which wasn't tested.
Line 111 - EMHT1, single cross 0,(0) - no variation. Authors also report exon skipping, which agrees with snaptron. The css is matched in SRAv2 1(1), so in agreement.
Line 113 - NAA10, single cross 0(3). Snaptron also has reads for the single skip, which wasn't detected experimentally. Similar result with SRAv2. Snaptron data not a good match
Line 117 - LGMDB2 (DYSF), two ticks, one cross. 2,1(5) css -79 and 198 have highest reads out of 5 css predicted by snaptron. Css 114 was not identified by snaptron and was also by far the weakest css detected by experiment. Similar result with SRAv2
Line 118 - CAV3, two crosses. 0(0) - no variation. Both css have reads in SRAv2 1,2 (3)
Line 129 - B2M, one tick, one cross 0,1(16). Both css were reported by the same group, css appeared to be equally used. The css at +407 has a large number of reads, but snaptron has no reads for the css at +27. SRAv2 has one read for +27 but 86777 reads for +407.
Line 137 - EXT1 one cross 0(4). Snaptron favours skipping (5 reads) but this wasn't detected and so the snaptron data is a poor match to the experimental results. SRAv2 has 6 candidate css of largely single reads and one of these matches css-69.
Line 138 - SUMF1, one cross. 0(1). For SRAv2 0(3). Snaptron predicts an exon skip rather than a css, for which the authors were unable to test because they could only use minigel analysis and the upstream exon and intron were too large to include.
Line 154 - CYP19A1, one cross, 0(5). SRAv2 has a match 5(6). However, snaptron has far greater reads for a single exon skip (115 reads) and a bss at -15 (45 reads). Snaptron data not a good match
Line 158 - CDH1, one cross 0(3). No reads for css 57 but the paper reports this as a minor transcript compared to exon skipping, which snaptron supports. SRAv2 has a single read for the css.
Line 173 - COL2A1, one cross. 0(1), so little variation. SRAv2 matches the css 2(4).
Line 195 - CD40LG, one cross 0(0), no sequencing variation. SRAv2 0(1), again little variation.
Column N lists whether exon skipping was detected (yes) not detected (no) or not reported/tested (nr). There are 95 cases where single exon skipping was not detected. Of these 26 cases involve first or single introns, where upstream exon skipping cannnot occur. For the remaining 69 examples there are 11 cases where single exon skipping is not found yet RNA sequencing has more reads for the exon s…
Column T, shading indicates possible false positives for css predctions: these are bss (within 1000 bp of the mutation) with markedly greater reads than the bss that matched the css.						22
Column R, shading indicates possible false positives for multiple exon skip predictions

## Sheet: 3'css
Syndrome	Gene	Link to DBASS	Chromosome	5'ss (hg 19)	3'ss that is mutated	Mutation	Activated 3' css	distance of css from normal ss	css observed in snaptron	Read rank	Distance rank	Notes	exon skipping	Normal reads	css reads or highest css read within 1000 bp of normal splice site	single exon skip reads	double exon skip reads	Skipping notes	bss reads>css reads
Acute intermittent porphyria	HMBS	http://www.dbass.org.uk/DBASS3/viewsplicesite.aspx?id=239	11	118960976	118962122	caca(g> t)CGG	118962109	-13	ü	4(23)	1(23)	The experimentally identified css matches a snaptron bss that has the fourth highest reads and is nearest to the mutated 3'ss out of 23 ss within 1000 bases of the mutated 3'ss.	nr	438068	37	5	0		1679(+448), 327(-250)
Alpha-mannosidosis	MAN2B1	http://www.dbass.org.uk/DBASS3/viewsplicesite.aspx?id=223	19	12766507	12763275	gcc c(a>g)gCAC	12763244	31	ü	1(12)	2(12)	The css matches a snaptron bss with by far the most reads	no	714254	14672	8	480		None
APOE deficiency	APOE	http://www.dbass.org.uk/DBASS3/viewsplicesite.aspx?id=94	19	45411210	45411789	ccgc( a>g)gGGC	45411737	-52	ü	1(29)	5(29)		no	8665742	1014	0	0	last intron	None
Arrhytmogenic right ventricular cardiomyopathy	PKP2	http://www.dbass.org.uk/DBASS3/viewsplicesite.aspx?id=231	12	32949042	32945666	tttc a(g>c)CTA	32945826, 32945649	-160, 17	üü	2,4 (6)	5,1(6)	The css match two of 6 snaptron bss with the second and fourth most reads, one of them is the nearest ss to the mutated 3'ss	nr	127337	9,2	0	0		17(-36)
Ataxia telangiectasia	ATM	http://www.dbass.org.uk/DBASS3/viewsplicesite.aspx?id=172	11	108235946	108236051	cct ta(g>c)TGA	108236064	13	ü	1(3)	1(3)	The five snaptron bss have similar low reads	no	455912	4	0	0	last intron	None
Autoimmune lymphoproliferative syndrome	APT1(FAS)	http://www.dbass.org.uk/DBASS3/viewsplicesite.aspx?id=245	10	90768755	90770295	ttcta(g> c)ATG	90770318	22	û	0(8)	na	Reported css not in snaptron, eight others predicted.	nr	360012	41	0	0		41(-33), 3(-48), 1(-107)
Autoimmune polyendocrinopathy-candidiasis-ectodermal dystrophy	AIRE	http://www.dbass.org.uk/DBASS3/viewsplicesite.aspx?id=2	21	45708342	45709539	tc( ctc)ccagGC	45709493	-46	ü	2(6)	1(6)		nr	990	21	1	0		66(-383)
Autosomal dominant optic atrophy	OPA1	http://www.dbass.org.uk/DBASS3/viewsplicesite.aspx?id=107	3	193384179	193384958	aaaca(g >t)TTA	193384963	4	ü	1(6)	1(6)	css matches a bss that has the most reads and is the nearest to the mutated 3'ss	nr	627653	238	218	0		None
Autosomal dominant polycystic kidney disease	PKD1	http://www.dbass.org.uk/DBASS3/viewsplicesite.aspx?id=20	16	2162788	2162475	cg gc(a>t)gGTG	2162401	74	ü	1(5)	2(5)	Most reads by far for the ss that matches the css.	no	77899	3226	15	0		None
Autosomal recessive congenital ichthyosis	TGM1	http://www.dbass.org.uk/DBASS3/viewsplicesite.aspx?id=590	14	24731239	24731090	ttgc (a>g)gAGG	24731078	12	ü	2(4)	2(4)	Mutation causes intron retention, exon skipping and css activation, relative amounts not reported.	yes	60257	3	96	0		11(+2),mutation may have weakened this bss.
Autosomal recessive retinitis pigmentosa	PDE6B	http://www.dbass.org.uk/DBASS3/viewsplicesite.aspx?id=90	4	628619	629668	ttt ca(g>t)GTG	629680	12	û	0(0)	na	No css predictions, relatively little RNA seq data.	nr	7147	0	0	0		na
B-cell chronic lymphocytic leukaemia	TP53	http://www.dbass.org.uk/DBASS3/viewsplicesite.aspx?id=118	17	7577498	7577156	gag t(a>c)gTGG	7577159, 7577132	-3, 24	üü	1,2(4)	1,2(4)	The two css match two snaptron bss with the most reads, out of four candidates.	nr	804113	1198, 129	99	2		None
Barth syndrome	TAZ	http://www.dbass.org.uk/DBASS3/viewsplicesite.aspx?id=199	X	153640290	153640422	cg cc(a>g)gAGT	153640453	31	ü	2(3)	2(3)	The css matches one of three similar strength bss. However, exon skipping was the major effect of the mutation, in agreement with snaptron.	yes	206924	53	765	14		88(+2), mutation may have weakened this bss
Batten disease	CLN3	http://www.dbass.org.uk/DBASS3/viewsplicesite.aspx?id=219	16	28489057	28488957	tccc a(g>t)ACC	28488952	5	ü	1(5)	1(5)	css matches a snaptron bss that is nearest and strongest	no	529267	1060	0	0	last intron	None
Beta-mannosidosis	MANBA	http://www.dbass.org.uk/DBASS3/viewsplicesite.aspx?id=117	4	103557021	103556203	cccc(a> g)gGTG	103556031	172	ü	1(8)	8(8)	css matches the bss with the most reads but furthest away, weak exon skipping also reported.	yes	289311	1264	0	0		None
Beta-thalassemia	HBB	http://www.dbass.org.uk/DBASS3/viewsplicesite.aspx?id=131	11	5247806	5246957	ccac( a>g)gCTC	5247228	-271	ü	1(24)	19(24)	css matches the strongest of numerous bss	no	110191509	795	0	0	last intron	None
Carpenter syndrome	RAB23	http://www.dbass.org.uk/DBASS3/viewsplicesite.aspx?id=563	6	57059567	57058733	ttcta (g>a)TTT	57058725	2	ü	4(6)	1(6)	bss that matches is the nearest to the mutated 3'ss	nr	277796	3	1	0		31(-372),5(-450),3(-679)
Cerebral cavernous malformations	CCM2	http://www.dbass.org.uk/DBASS3/viewsplicesite.aspx?id=534	7	45078026	45103516	tttc( ag>t)TAT	45103523	7	ü	1(4)	2(4)	Css match the snaptron bss with the most reads within 1000 bp of the mutated 3'ss. The css is also reported to splice with an alternative upstream 5'ss 45067397. Snaptron supports this with 52 reads and a rank of 2(6). However, snaptron also predicts single and double exon skipping, not clear if this was tested.	nr	393840	171	4234	5801		None
CHARGE syndrome	CHD7	http://www.dbass.org.uk/DBASS3/viewsplicesite.aspx?id=597	8	61714153	61720775	ttgc (a>g)gAAG	61720778	3	ü	1(3)	1(3)	Also report minor exon skipping	yes	114991	2324	112	7		None
Chronic granulomatous disease	CYBA	http://www.dbass.org.uk/DBASS3/viewsplicesite.aspx?id=22	16	88713162	88712606	36 base deletion	88712800	-179	ü	2(12)	4(12)	Snaptron bss with more reads is further away	nr	4287390	405	488	0		3788(-406)
Chronic myeloid leukemia	ABCC3	http://www.dbass.org.uk/DBASS3/viewsplicesite.aspx?id=569	17	48745371	48745790	ccgta (g>a)GCC	48745795	5	ü	1(3)	1(3)	Mutation mainly caused intron retention	no	237072	692	5	3		None
Citrullinemia	ASS1	http://www.dbass.org.uk/DBASS3/viewsplicesite.aspx?id=79	9	133374958	133376362	tttaca( g>c)GCT	133376369	7	ü	3(8)	1(8)		no	763616	18, 5	0	0	last intron	90(-651), 18(+25)
Cohen syndrome	COH1	http://www.dbass.org.uk/DBASS3/viewsplicesite.aspx?id=191	8	100836207	100844596	tttta( g>t)TAT	100844612	16	ü	3(7)	2(7)	The two bss with more reads are further away. Skipping also predicted	nr	87735	10	310	0		359(+172), 26(+43)
Colon tumor cell lines with microsatellite instability	ATM	http://www.dbass.org.uk/DBASS3/viewsplicesite.aspx?id=27	11	108106562	108114679	(ttt)aag AAT	108114701	22	ü	1(6)	2(6_		nr	130847	15804	4	1243		None
Congenital adrenal hyperplasia	CYP21A2	http://www.dbass.org.uk/DBASS3/viewsplicesite.aspx?id=579	6	32007425	32007525	ccgc (a>g)gTTC	32007541	17	ü	1(3)	1(3)		no	13968	698	3	0		None
Congenital hypogonadotropic hypogonadism	TAC3	http://www.dbass.org.uk/DBASS3/viewsplicesite.aspx?id=559	12	57407361	57407173	t caca(g>c)A TC	57407195	-22	ü	1(3)	1(3)		no	61164	311	0	0		None
Congenital hypothyroidism	DUOX2	http://www.dbass.org.uk/DBASS3/viewsplicesite.aspx?id=596	15	45397840	45396564	g tgca(g>c)G TG	45396578	-14	û	0(2)	na	css is non-canonical and therefore not in snaptron.	nr	30180	1	0	1		na
Congenital insensitivity to pain with anhidrosis	NTRK1	http://www.dbass.org.uk/DBASS3/viewsplicesite.aspx?id=50	1	156836771	156837895	cccca(g>c )GGT	156837854	-41	ü	6(6)	3(6)	Snaptron has many other stronger bss. Authors used exon trap analysis as RNA was not available. This precluded skipping analysis, which is predicted by snaptron both for a single skip and double (187 reads) and triple (496 reads).	nr	14944	6	136	187, 496(triple)		87(+585), 33(+132), 21(+93). Primary effect of this mutation might be exon skipping.
Crigler-Najjar syndrome, type I	UGT1A1	http://www.dbass.org.uk/DBASS3/viewsplicesite.aspx?id=198	2	234676583	234676865	tctc (a>g)gGTC	234676972	107	ü	1(4)	4(4)		no	332528	135	1	0		None
Ehlers-Danlos syndrome	COL1A2	http://www.dbass.org.uk/DBASS3/viewsplicesite.aspx?id=6	7	94029601	94030878	ctcta( g>c)AAC	94030893	15	ü	1(4)	1(4)		no	4012616	99	55	0		None
Ehlers-Danlos syndrome	COL5A1	http://www.dbass.org.uk/DBASS3/viewsplicesite.aspx?id=7	9	137593180	137619111	tcc(a >g)gGGT	137619123, 137619126	12,15	üü	1,2(3)	1,2(3)	Paper also reports that double exon skipping is a stronger event than css usuage, which is in agreement with snaptron.	yes	805707	10,6	1	60		None
Epidermolysis bullosa	LAMC2	http://www.dbass.org.uk/DBASS3/viewsplicesite.aspx?id=59	1	183184724	183187524	cccca( g>a)AG/AC	183187526	2	ü	1(1)	1(1)	Css matches the only bss reported by snaptron. Paper also reports the main effect is exon skipping, which agrees with snaptron	yes	482124	42	186	0		None
Epidermolysis bullosa	COL17A1	http://www.dbass.org.uk/DBASS3/viewsplicesite.aspx?id=16	10	105807496	105806532	ctgca(g>t )GTC	105806796,105806601, 105806523	-264,-69, 9	üûü	1,0,2(6)	3,1(6)	Major css reported as 105806796, minor amounts of two further css and minor amounts of an exon skip. Snaptron bss match the major css and one of the two minor css.	yes	320182	49,9	1	9		None
Epidermolysis bullosa	KRT14	http://www.dbass.org.uk/DBASS3/viewsplicesite.aspx?id=93	17	39742561	39741310	ctgc(a>c)g ATT	39741300	10	ü	6(9)	1(9)	css matches a bss with joint last reads but nearest to the 3'ss. 9 of the bss had similar reads with one stronger ss (44 reads). Observation of skipping agrees with snaptron	yes	4074540	1	595	1		44(-40), 3(-461), 3(-740), 2(-427)
F5 deficiency	F5	http://www.dbass.org.uk/DBASS3/viewsplicesite.aspx?id=538	1	169521794	169519978	ttgt(a>g)g ATC	169520002	-24	ü	2(5)	2(5)		nr	66608	10	17	1		14(+23)
Familial hypercholesterolemia	LDLR	http://www.dbass.org.uk/DBASS3/viewsplicesite.aspx?id=4	19	11200292	11210898	tctca( g>c)TGG	11210908	10	ü	2(4)	1(4)	Css is a match to a bss in snaptron (within 1000 bases of the mutated 3'ss) that is the nearest and has the second most reads. However, snaptron strongly favours exon skipping, which the authors discuss and were surprised not to detect.	no	405226	6	1529	142		17(-83)
Familial thrombocytopenia	RUNX1	http://www.dbass.org.uk/DBASS3/viewsplicesite.aspx?id=147	21	36259139	36253011	gttta( g>t)GTG	36252998	13	û	0(3)	na	The css does not match any of the four snaptron bss, furthermore exon skipping is favoured by snaptron. The authors report that use of the css was very weak and did not report that they looked for skipping.	nr	300245	0 (10)	62	9		2(+51)
Fanconi anemia	FANCA	http://www.dbass.org.uk/DBASS3/viewsplicesite.aspx?id=200	16	89851261	89849511	tcctca (g>t)GTG	89849601	-90	ü	1(3)	1(3)	Snaptron has highest reads for a double exon skip	nr	226286	26	37	356		None
Gangliosidosis	GLB1	http://www.dbass.org.uk/DBASS3/viewsplicesite.aspx?id=257	3	33058200	33055803	ttgc(a> g)gGGT	33055831	-28	ü	1(4)	1(4)	Css matches the strongest of 4 bss, skipping also predicted	nr	599695	32	73	0		None
Gaucher disease	GBA	http://www.dbass.org.uk/DBASS3/viewsplicesite.aspx?id=581	1	155205471	155205103	attca (g>a)CAA	155205099	4	ü	1(9)	1(9)		no	421089	666	46	0		None
Glanzmann thrombasthenia	ITGA2B	http://www.dbass.org.uk/DBASS3/viewsplicesite.aspx?id=128	17	42463191	42463085	13bp deletion of 3'ss	42463067	18	ü	1(2)	1(2)		nr	90582	3	1	0		None
Glucose-6-phosphate dehydrogenase deficiency	G6PD	http://www.dbass.org.uk/DBASS3/viewsplicesite.aspx?id=105	X	153760781	153760678	tca c(a>g)gAAC	153760669	9	ü	1(14)	1(14)		nr	1950994	78	2	0		None
Glycosylation deficiency	ALG8	http://www.dbass.org.uk/DBASS3/viewsplicesite.aspx?id=110	11	77849755	77838483	gagt(a>g)g CCA	77838472	11	ü	2(4)	2(4)	3'css 77838472 is joint 1st of two downstream exonic css predicted by snaptron, However, there is a predicted upstream 3' css at 77838486 supported by 345 reads. The inactivating mutation of 3'ss 77838483 is at position 77838484 and so might have had an impact upon the predicted 3'css 77838486. RNA seq also predicts exon skipping, which wasn't investigated. Interestingly, there are also a lot of …	nr	25242	3	582	86		345(-3)
Hyper-parathyroididsm	HRPT2	http://www.dbass.org.uk/DBASS3/viewsplicesite.aspx?id=260	1	193107304	193110979	tttta(g)GTC	193110938	-41	ü	4(13)	4(13)	Snaptron has more reads for a nearer potential css at 193110966 (338 reads). Skipping also predicted (704 reads), but not tested.	nr	505567	130	704	21		338(-14), 201(-141)
Hypoxanthine-guanine phosphoribosyltransferase deficiency	HPRT1	http://www.dbass.org.uk/DBASS3/viewsplicesite.aspx?id=141	X	133594369	133607388	tttc(a> g)gATT	133607393	5	ü	1(8)	2(8)	Paper also reports single (60%) and double exon skips (20%), css (20%).	yes	431084	410	26	914		None
Isolated COX deficiency	COX8A	http://www.dbass.org.uk/DBASS3/viewsplicesite.aspx?id=594	11	63742267	63743696	gtgta (g>c)GAA	63743745	49	ü	1(18)	4(18)		no	5479029	489	0	0	single intron	None
Isovaleric acidemia	IVD	http://www.dbass.org.uk/DBASS3/viewsplicesite.aspx?id=111	15	40705287	40707087	tggca(g >a)CTG	40707072	-15	ü	2(19)	1(19)	Exon skipping finding in accord with snaptron, ratio of css to skip not clear	yes	428366	6084	14926	4		7887(-66)
Keutel syndrome	MGP	http://www.dbass.org.uk/DBASS3/viewsplicesite.aspx?id=263	12	15038664	15037180	tttc(a>g)gA AT	15037167, 15035966	13, 1214	üü	2,1(7)	2,7(7)	Other aberrant (but not detailed) transcripts also reported.	nr	3238681	11155	135	79		None
Kniest dysplasia	COL2A1	http://www.dbass.org.uk/DBASS3/viewsplicesite.aspx?id=115	12	48380617	48380227	cctc( a>g)gGGC	48380209	18	û	0(2)	na	Reported css not in snaptron, which instead reports two bss, one at 48379876 (5 reads)	no	79852	5	1	0		5(+351)
Li-Fraumeni syndrome	TP53	http://www.dbass.org.uk/DBASS3/viewsplicesite.aspx?id=126	17	7579699	7579591	ctaca(g> a)TCC	7579572	19	ü	1(1)	1(1)	ratio of css to skip not clear	yes	674637	65	106	0		None
Loeys-Dietz syndrome type 4	TGFB2	http://www.dbass.org.uk/DBASS3/viewsplicesite.aspx?id=578	1	218607791	218609311	ttcaa (g>a)GTA	218609426	115	ü	1(2)	2(2)		no	127852	5967	97	2		None
Lysinuric protein intolerance	SLC7A7	http://www.dbass.org.uk/DBASS3/viewsplicesite.aspx?id=151	14	23245403	23245146	cctt(a >t)gACT	23245136	10	ü	4(6)	1(6)	Nearest of 6 css predictions of 1,1,1,5,7,5 reads. Snaptron strongly predicts exon skipping	nr	196629	1	1201	1		105(+509), 5(+226). The bss at +509 wasn't tested and is in the downstream exon
Maturity-onset diabetes of the young	TCF1	http://www.dbass.org.uk/DBASS3/viewsplicesite.aspx?id=184	12	121432209	121434064	ctcc(a>g)g GTG	121434266	202	ü	1(1)	1(1)		no	15872	4	0	0		None
Maturity-onset diabetes of the young	GCK	http://www.dbass.org.uk/DBASS3/viewsplicesite.aspx?id=266	7	44189567	44189459	tggca( g>a)GAC	44189486	-27	ü	1(1)	1(1)		nr	9735	5	0	0		None
Maturity-onset diabetes of the young, type 9	PAX4	http://www.dbass.org.uk/DBASS3/viewsplicesite.aspx?id=600	7	127251998	127251731	tttta (g>a)CAG	127251728	3	ü	1(1)	1(1)	The authors detected exon skipping in both mutant and wild type minigene constructs, so were concerned that the skipping was an artefact. The css activation was unique	nr	1026	18	2	0		None
Mucopolysaccharidosis, type I	IDUA	http://www.dbass.org.uk/DBASS3/viewsplicesite.aspx?id=64	4	981738	994399	ctg( c>g)agGGG	994341	-58	ü	3(13)	3(13)	css matches the strongest of the 7 bss nearest to the 3'ss. However, many stronger upstream 3'ss in the 12kb intron, possibly recursive sites.	nr	111678	149	0	1		606(-849), 603(-955),
Mucopolysaccharidosis, type II	IDS	http://www.dbass.org.uk/DBASS3/viewsplicesite.aspx?id=159	X	148571844	148568630	aacta(g>c)G GT	148568618	12	ü	3(14)	1(14)	The 5'ss is alternatively spliced to three different acceptors	nr	990741	28	1021	0		112269(-227), 29(+79). -227 is an ass.
Multiple developmental abnormalities	TGFBR2	http://www.dbass.org.uk/DBASS3/viewsplicesite.aspx?id=270	3	30648470	30686238	cctc(a> g)gTTA	30686256	18	ü	1(2)	1(2)	Quite a bit of alt splicing involving the 3'ss.	nr	378396	14	0	12(double) 1067 (triple)		None
Muscle phosphofructokinase deficiency	PFKM	http://www.dbass.org.uk/DBASS3/viewsplicesite.aspx?id=124	12	48526841	48527097	tgtc(a>c) gGTA	48527102, 48527109	5, 12	üü	1,3(8)	1,3(8)		nr	897344	349, 23	8	0		None
Muscular dystrophy	LAMA2	http://www.dbass.org.uk/DBASS3/viewsplicesite.aspx?id=170	6	129649558	129663487	ttaca(g>c)A AT	129663556	69	û	0(0)	na	Very little splicing variation	nr	58446	0	1	0		na
Myeloperoxidase deficiency	MPO	http://www.dbass.org.uk/DBASS3/viewsplicesite.aspx?id=220	17	56349015	56348225	atgc(a >c)gGTT	56348334	-109	ü	2(26)	6(26)	Snaptron has 18802 reads for a 3'css candidate at -24 bases. Not seen by authors, possible tissue specific use or a false positive?	no	3169094	1595	0	0	last intron	18802(-24)
Naevoid basal cell carcinoma syndrome	PTCH	http://www.dbass.org.uk/DBASS3/viewsplicesite.aspx?id=29	9	98242250	98241430	ctgc( a>c)gCGC	98241414	16	ü	2(5)	1(5)		nr	101246	12	0	0		17(-113)
Neurofibromatosis type II	NF2	http://www.dbass.org.uk/DBASS3/viewsplicesite.aspx?id=626	22	30038275	30050645	ttcc (a>g)gTAT	30050665	20	ü	5(5)	1(5)	snaptron has more reads for exon skipping than for css activation. The authors used the correct primers to see skipping and obtained many aberrant bands, although only the css +20 band was seen consistently and therefore sequenced.	nr	257070	1	20	36		11(-502), 6(-482), 5(-36), 3(-171)
Neurofibromatosis, type I	NF1	http://www.dbass.org.uk/DBASS3/viewsplicesite.aspx?id=71	17	29592358	29652837	cctt(a >t)gGTT	29653130	293	ü	1(4)	4(4)	Paper also reports single exon skipping, ratio not reported. Not clear if possibe double exon skip tested.	yes	118116	68	40	88		None
Oligoadenylate synthase activity	OAS1	http://www.dbass.org.uk/DBASS3/viewsplicesite.aspx?id=23	12	113355506	113357193	tttca(g> a)G/CT	113357291	98	ü	1(22)	1(5)	Snaptron shows that the css 113357291 is an ass that is presumably further enhanced by the reported splice site mutation	no	203072	31545	0	0	last intron	None
Ornithine transcarbamylase deficiency	OTC	http://www.dbass.org.uk/DBASS3/viewsplicesite.aspx?id=169	X	38240683	38260527	ccac(a >t)gTGT	38260539	12	ü	1(1)	1(1)		nr	35370	2	0	0		None
Osteopetrosis and infantile osteopetrosis	TCIRG1	http://www.dbass.org.uk/DBASS3/viewsplicesite.aspx?id=282	11	67816465	67816547	cgc ca(g>a)GCA	67816730	183	ü	1(7)	5(7)	Matching bss has most reads by far out of 7 sites. Single exon skip detected, double skip (predicted by snaptron) not tested.	yes	1169515	2389	40	222		None
Peutz-Jeghers syndrome	STK11	http://www.dbass.org.uk/DBASS3/viewsplicesite.aspx?id=285	19	1207203	1218415	tc cc(a>g)gGGA	1218291, 1218302	-124,-113	üü	1,2(7)	3,2(7)	Two most supported bss out of 7 match the css. Snaptron does not predict a single but does predict a double exon skip (2058 reads), not seen. .	no	789758	79,56	0	2058		None
Phenylketonuria	PAH	http://www.dbass.org.uk/DBASS3/viewsplicesite.aspx?id=546	12	103306568	103288697	ttc t(a>g)gGAG	103288778	-81	ü	4(4)	2(4)	103288778 is one of five nearby similar background ss identified by snaptron. A background ss at 103288694 is stronger (8 reads) and nearer but may have been inactivated by the splice site mutation. Snaptron favours exon skipping (not tested).	nr	329799	1	52	24		8(+3), 2(-35),2(-128). Bss+3 may have been affected by the mutation.
Pseudoexanthoma elasticum	ABCC6	http://www.dbass.org.uk/DBASS3/viewsplicesite.aspx?id=606	16	16295857	16292040	cgcc(a>g)gGTC	16292230, 16292023	-190, 17	üü	1,2(3)	2,1(3)		nr	40696	15	22	2		None
Pseudohypoaldosteronism, type I	SCNN1G	http://www.dbass.org.uk/DBASS3/viewsplicesite.aspx?id=81	16	23197910	23200691	tggca(g>a )GTA	23200697	6	ü	2(4)	2(4)	Skipping also reported, ratio not clear.	yes	23393	4	0	10		31(+106)
Pyruvate dehydrogenase deficiency	PDHA1	http://www.dbass.org.uk/DBASS3/viewsplicesite.aspx?id=547	X	19375838	19377033	ccata(g>a)T TA	19376912	-121	ü	1(9)	2(9)	Strongest by far of the snaptron bss	nr	14073	269	1	0		None
Pyruvate kinase deficiency	PKLR	http://www.dbass.org.uk/DBASS3/viewsplicesite.aspx?id=116	1	155269888	155265548	ttct(a >t)gGGC	155265542	6	ü	1(1)	1(1)		no	37489	3	0	0		None
Pyruvoyl-tetrahydropterin synthase deficiency	PTPS	http://www.dbass.org.uk/DBASS3/viewsplicesite.aspx?id=163	11	112097250	112099316	ggt(c>g)a gTAA	112099328	12	ü	2(7)	2(7)	There is a snaptron bss with 971 reads, 314 bases upstream, possible false positive? Snaptron also supports single and double skips (not tested).	nr	434162	67	62	308		971(-314)
Rabson-Mendenhall's syndrome	INSR	http://www.dbass.org.uk/DBASS3/viewsplicesite.aspx?id=58	19	7174593	7172446	cctt(a >g)gACA	7172434	12	ü	1(4)	1(4)	Exon skipping more frequent than css activation	yes	143780	6	122	2		None
Recessive dystrophic epidermolysis bullosa	COL7A1	http://www.dbass.org.uk/DBASS3/viewsplicesite.aspx?id=17	3	48631800	48631130	caa (c>g)agGAC	48631200	-70	ü	3(12)	4(12)	Snaptron also indicates single and double exon skipping, neither was detected.	no	277848	151	895	494		539(+5), 254(+136). Mutation may have impaired bss+5.
Rothmund-Thomson syndrome	RECQL4	http://www.dbass.org.uk/DBASS3/viewsplicesite.aspx?id=158	8	145739311	145739097	catca(g>c)GCA	145739022	75	ü	1(18)	4(18)	Skipping also reported, similar amounts of css and single exon skip	yes	319103	47	9356	204		None
Sjogren-Larsson syndrome (fatty aldehyde dehydrogenase deficiency)	FALDH	http://www.dbass.org.uk/DBASS3/viewsplicesite.aspx?id=139	17	19555946	19559678	tttg(a>g)gG AT	19559711	33	ü	1(11)	7(11)		nr	526686	1239	108	4363		None
Smith-Lemli-Opitz syndrome	DHCR7	http://www.dbass.org.uk/DBASS3/viewsplicesite.aspx?id=181	11	71148857	71146886	cccca(g>c)GGT	71147020	-134	ü	1(14)	4(14)	From snaptron 71147020 is clearly an alternative ss that presumably is further enhanced by the reported splicing mutation	no	778417	21447(as)	0	0	last intron	None
Spastic paraplegia	SPG4	http://www.dbass.org.uk/DBASS3/viewsplicesite.aspx?id=212	2	32340905	32341187	tctta(g>a)TGG	32341195	8	ü	1(4)	1(4)		nr	173347	74	5	0		None
Steel syndrome	COL27A	http://www.dbass.org.uk/DBASS3/viewsplicesite.aspx?id=604	9	117031575	117033007	ttcc (a>g)gGGA	117033013, 117033017	6,10	ûû	0(5)	na	Snaptron only has reads for bss within the intron	nr	79340	0,0	1	4		392(-950), 23(-938)
Stickler syndrome	COL2A1	http://www.dbass.org.uk/DBASS3/viewsplicesite.aspx?id=65	12	48381393	48381097	tttc(a>g)gGGT	48381081	16	ü	1(3)	1(3)		no	86755	6	4	1		None
Supravalvular aortic stenosis	ELN	http://www.dbass.org.uk/DBASS3/viewsplicesite.aspx?id=72	7	73462887	73466079	caa(c> g)agGTG	73466035	-44	ü	2(3)	2(3)	joint second of three predicted css, single exon skip also detected weakly. Snaptron only has reads for a double skip, which wasn't apparently tested.	yes	482745	1	0	699		13(+12), possibly affected by the mutation
Syndromic short stature	LHX4	http://www.dbass.org.uk/DBASS3/viewsplicesite.aspx?id=192	1	180240670	180240969	tggca( g>c)GTT	180240981, 180240986	12,17	ûû	0(0)	na	No css predictions, not enough RNA seq data	nr	9712	0,0	3	0		na
Tangier disease	ABCA1	http://www.dbass.org.uk/DBASS3/viewsplicesite.aspx?id=614	9	107594854	107594109	tatca (g>a)TGT	107594087	22	ü	3(4)	2(4)	Snaptron has most reads (96) for a bss at 107594125 (-16), possible false positive	nr	130742	3	0	0		132(-14), 14(-176)
Thiopurine methyltransferase deficiency	TPMT	http://www.dbass.org.uk/DBASS3/viewsplicesite.aspx?id=62	6	18132363	18131012	tttca (g>a)G/TA	18131342	-330	ü	1(7)	4(7)		no	160294	99	0	0	last intron	None
Tuberous sclerosis	TSC1	http://www.dbass.org.uk/DBASS3/viewsplicesite.aspx?id=533	9	135786839	135786501	tcc(c> g)agGCT	135786603	-102	ü	1(9)	2(9)		nr	181963	984	1198	448		None
Tuberous sclerosis	TSC2	http://www.dbass.org.uk/DBASS3/viewsplicesite.aspx?id=66	16	2108875	2110670	t tc(c>g)agG CC	2110726	56	ü	1(11)	4(11)		yes	249659	2432	1988	148		None
Turcot syndrome	PMS2	http://www.dbass.org.uk/DBASS3/viewsplicesite.aspx?id=549	7	6031603	6029587	cctta(g>t )AAT	6029560	27	ü	2(3)	1(3)	single exon skipping (strongest) and css activation reported	yes	139317	6	2270	74		19(-921)
Ullrich congenital muscular dystrophy	COL6A2	http://www.dbass.org.uk/DBASS3/viewsplicesite.aspx?id=288	21	47541038	47541469	cctc (a>g)gGGA	47541497	28	ü	2(10)	2(10)		nr	2674167	19	10	25		105(-42)
Usher syndrome, type II	USH2A	http://www.dbass.org.uk/DBASS3/viewsplicesite.aspx?id=557	1	216424244	216420569	cttt a(g>c)GGC	216420562	7	û	0(0)	na	no css predictions, not enough RNA seq data	no	706	0	0	0		na
Usher syndrome, type II	CDH23	http://www.dbass.org.uk/DBASS3/viewsplicesite.aspx?id=555	10	73485278	73490225	ccaca(g>t )GTG	73490276	51	û	0(1)	na	both css acitvation and single exon skipping, ratio not reported	yes	13206	0	46	0		4(+54)
von Willebrand disease	VWF	http://www.dbass.org.uk/DBASS3/viewsplicesite.aspx?id=290	12	6172119	6167211	ctg(c> a)agCTG	6167273	-62	ü	1(5)	4(5)	Paper also reports single exon skipping, similar ratio, double skip not tested.	yes	210968	574	166	1591		None
Wilson disease	ATP7B	http://www.dbass.org.uk/DBASS3/viewsplicesite.aspx?id=44	11	52524142	90770295	tcat( a>g)gGCA	52523972	-39	ü	1(2)	1(2)	Paper also reports similar amount of exon skipping which is supported by snaptron, double skip not tested.	yes	49536	7	685	425		None
X-linked Alport syndrome	COL4A5	http://www.dbass.org.uk/DBASS3/viewsplicesite.aspx?id=583	X	107819203	107821181	tctt (a>t)gGGC	107821200	19	ü	2(3)	2(3)	double exon skip might not have been tested	no	118028	2	0	5		6(+91)
X-linked hyper-IgM syndrome	HIGM1/tnfsf5	http://www.dbass.org.uk/DBASS3/viewsplicesite.aspx?id=57	X	135738578	135741197	ac (a>g)gTGT	135741205	8	ü	1(3)	1(3)		no	37213	2	0	0	last intron	None
X-linked intellectual disability	IQSEC2	http://www.dbass.org.uk/DBASS3/viewsplicesite.aspx?id=601	X	53268376	53267489	cc (ac)agATT	5326410	79	ü	1(8)	5(8)		no	96873	69	0	0		None
X-linked intellectual disability type Nascimento	UBE2A	http://www.dbass.org.uk/DBASS3/viewsplicesite.aspx?id=613	X	118716640	118717089	cttt (a>g)gTCT	118717118	29	ü	1(8)	1(8)		no	1408780	38	0	0	last intron	None
X-linked mental retardation	FACL4	http://www.dbass.org.uk/DBASS3/viewsplicesite.aspx?id=291	X	108917630	108912403	tttc(a> g)gGAA	108912431	-28	ü	2(6)	2(6)	The bss with higher reads is further away	nr	486324	36	13	72
13 crosses, 97 ticks. 62 ticks are first rank, 87 top 3 rank
All examples that have crosses are discussed below. Yellow highlights indicate examples where the snaptron data is a poor match to the experimental data. Matches to SRAv2 are seen for RUNX1, COL2A1, USH2A and CDH23
Line 7 APT1. Single cross. 0(8). Reported css not in snaptron, eight others predicted. 0(10) SRAv2. Not a good match.
Line 12 PDE6B. Single cross. 0(0) No css predictions due to relativley little RNA seq data. Also 0(0) for SRAv2.
Line 28 DUOX. Single cross. 0(2). Css is non-canonical and therefore not in snaptron
Line 34 COL17A1. two ticks, one cross. Snaptron predicts the major css, one of the two minor css and the exon skipping event. SRAv2 1,0,2(7)
Line 38 RUNX1. single cross. 0(4) This site not predicted, instead skipping predicted by snaptron. The authors report that use of the css was very weak and did not report that they looked for skipping. Css matches a bss in SRAv2 2(7).
Line 50 COL2A1. single cross. 0(2). Relatively little sequencing variation. Match in SRAv2 3(7).
Line 61 LAMA2. single cross 0(0)No background ss due to relatively little sequencing variation. SRAv2 0(0).
Line 85 LHX4. Double cross 0(0) No background ss due to relatively little sequencing data. SRAv2 0(1)
Line 92 USH2A. Single cross 0(0) no css predictions, not enough RNA seq data. Match in SRAv2 1(1).
Line 93 CDH23. Single cross 0(1). Report of exon skipping in agreement with snatpron. Match to css in SRAv2 1(2).
Column N lists whether exon skipping was detected (yes) not detected (no) or not reported/tested (nr). There are 31 reports where single exon skipping was not detected. Of these 12 reports involve last or single introns, where downstream exon skipping cannnot occur, and one report where snaptron has no css nor exon skip reads (row 92). For the remaining 18 reports there are 2 cases where single e…
Column T, shading indicates possible false positives for css predictions: these are bss (within 1000 bp of the mutation) with markedly greater reads than the bss that matched the css.
Column R, shading indicates possible false positives for multiple exon skip predictions
